# Supplementary material
Source: MDPI journal article supplement (https://www.mdpi.com/2073-4441/13/9/1281)
Supplement: s1 [file s1]

## Supplementary Materials

### DP1 discharge scenarios

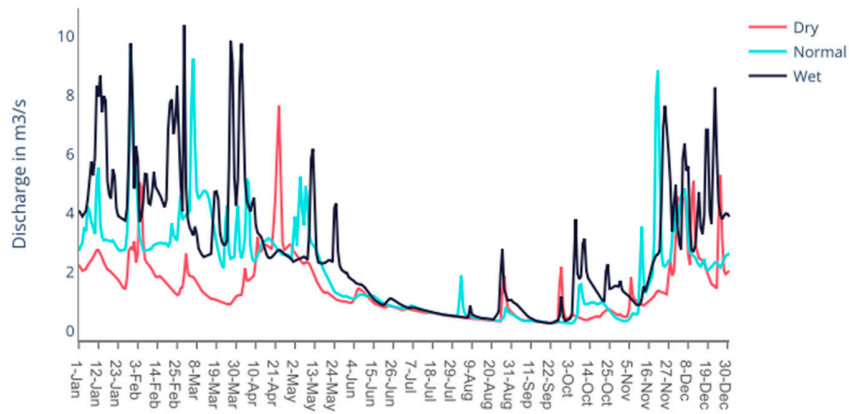

### DP2 discharge scenarios

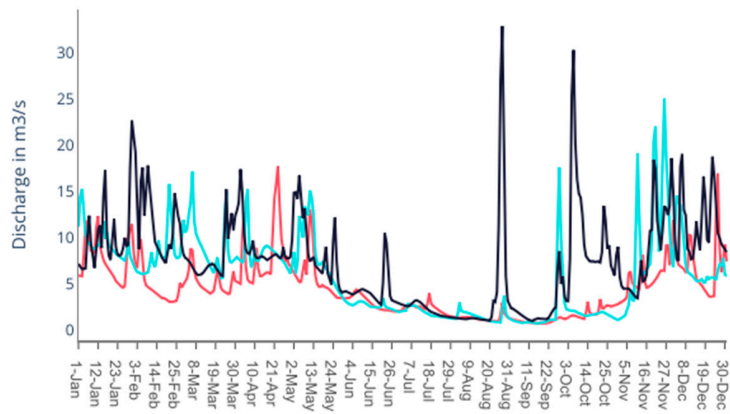

**Figure S1.** Hydrological time series used as representative discharge scenarios for the considered diversion points (DP1 and DP2).

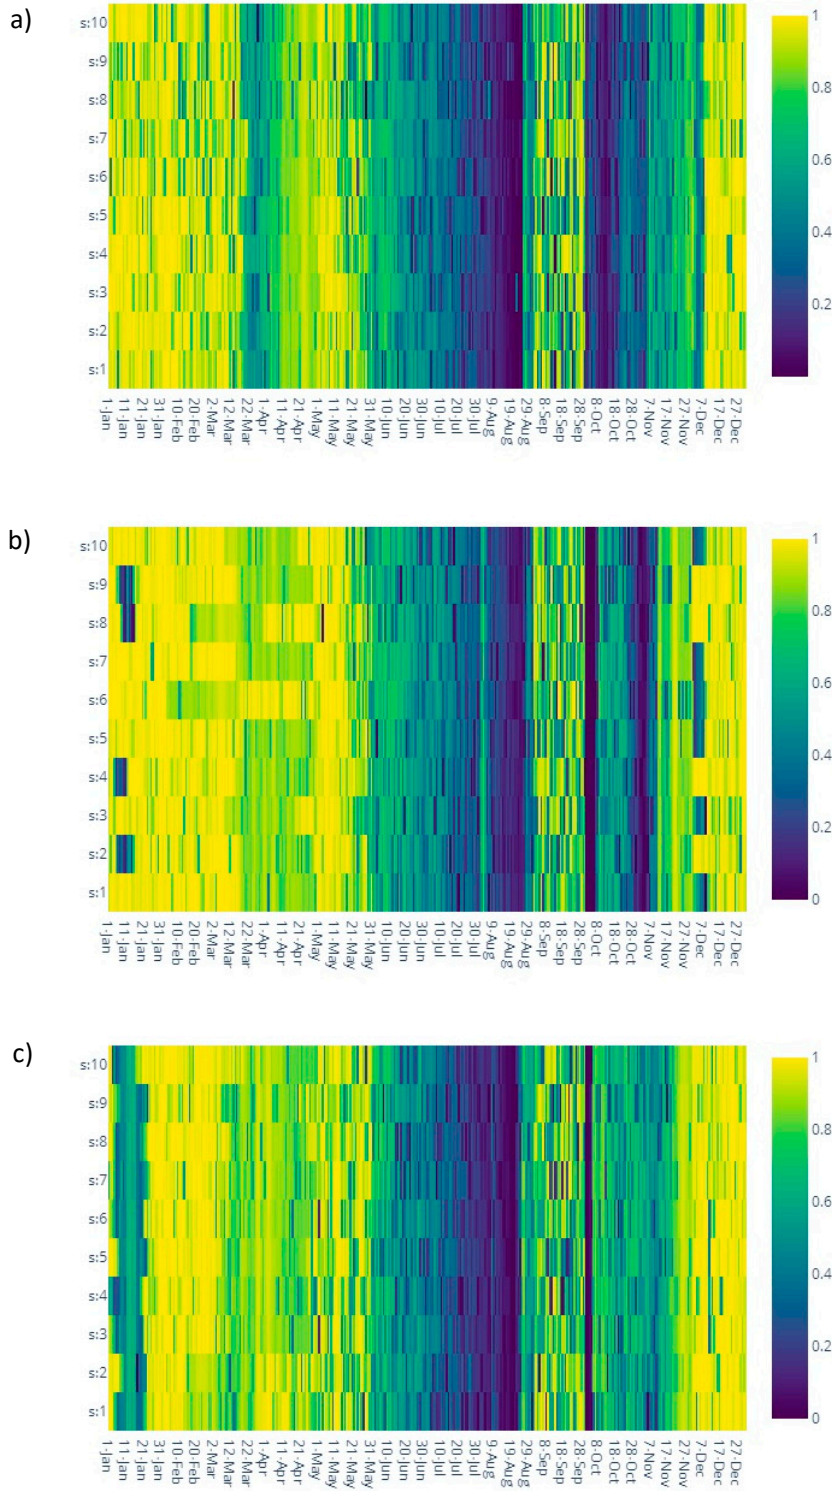

**Figure S2.** Combination of the average daily diversion percentages with respect to the natural discharge normalized to 0-1 range for each single run of the model ('s1-s10') under the same scenario. Yellow (1) tiles correspond with the highest diversion percentage, whereas blue (0) tiles correspond with the lowest optimal diversion. **Results for DP1** under dry (a), normal (b) and wet (c) scenarios.

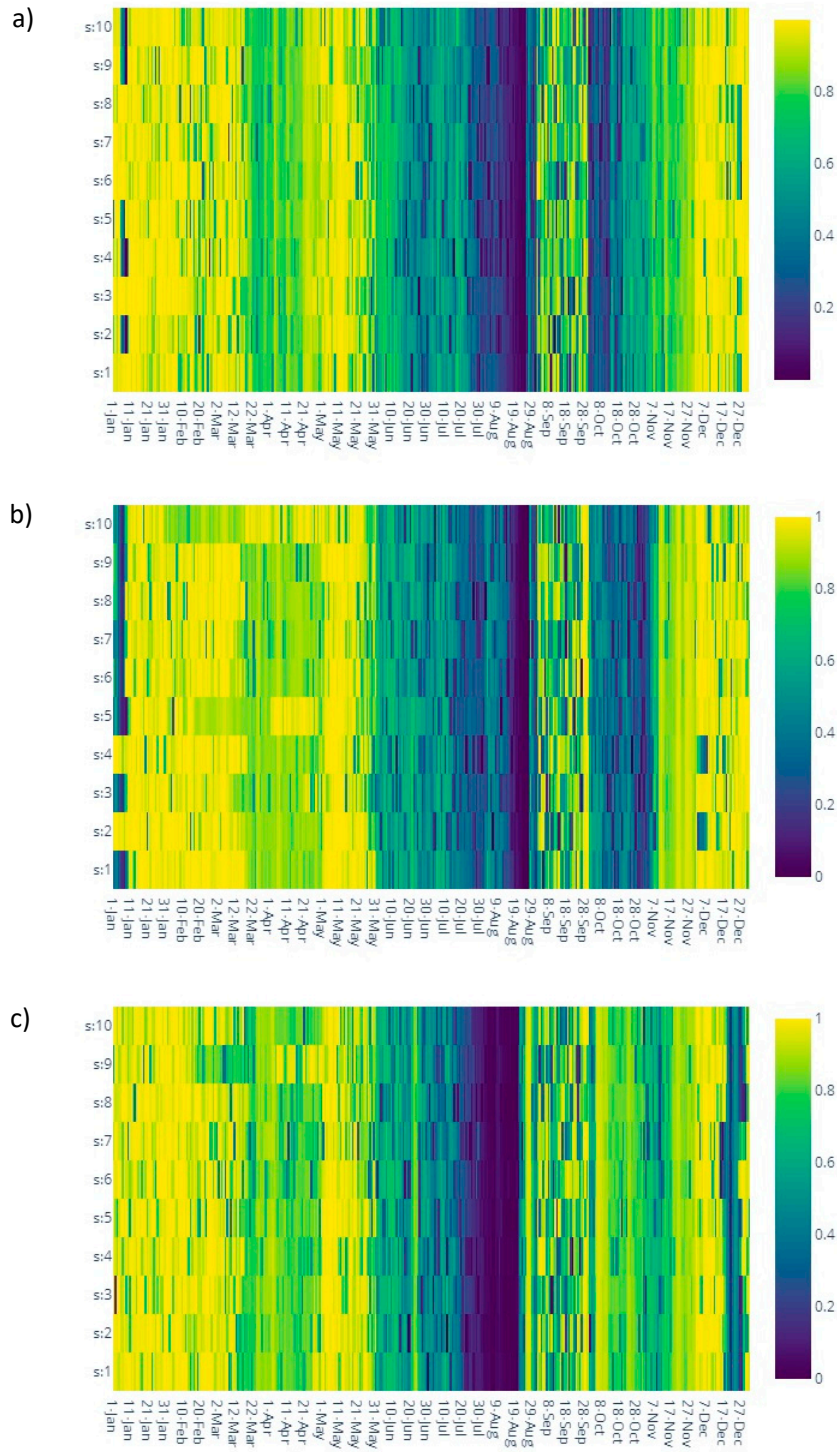

**Figure S3.** Combination of the average daily diversion percentages with respect to the natural discharge normalized to 0-1 range for each single run of the model ('s1-s10') under the same scenario. Yellow (1) tiles correspond with the highest diversion percentage, whereas blue (0) tiles correspond with the lowest optimal diversion. **Results for DP2** under dry (a), normal (b) and wet (c) scenarios.

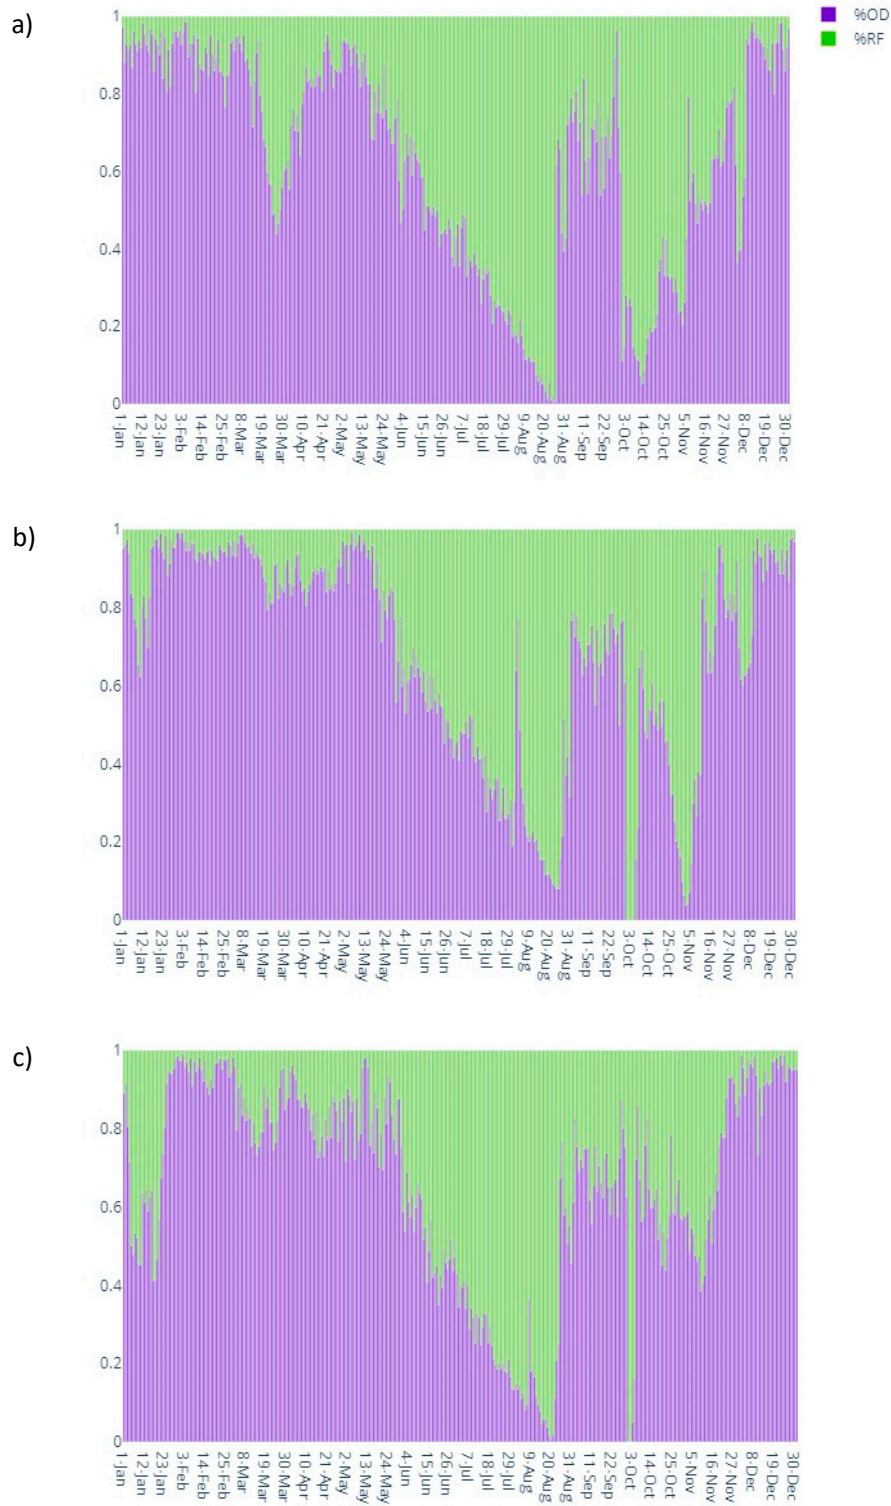

**Figure S4.** Barchart showing the normalized fraction (expressed in %) of discharge that has been optimized for abstraction (purple 'OD' bars) with respect to the natural flow (green 'RF' bars) at the daily scale. The diverted discharge is calculated as a daily average for all the 10 runs of the model for each scenario. **Results for DP1** under dry (a), normal (b) and wet (c) scenarios.

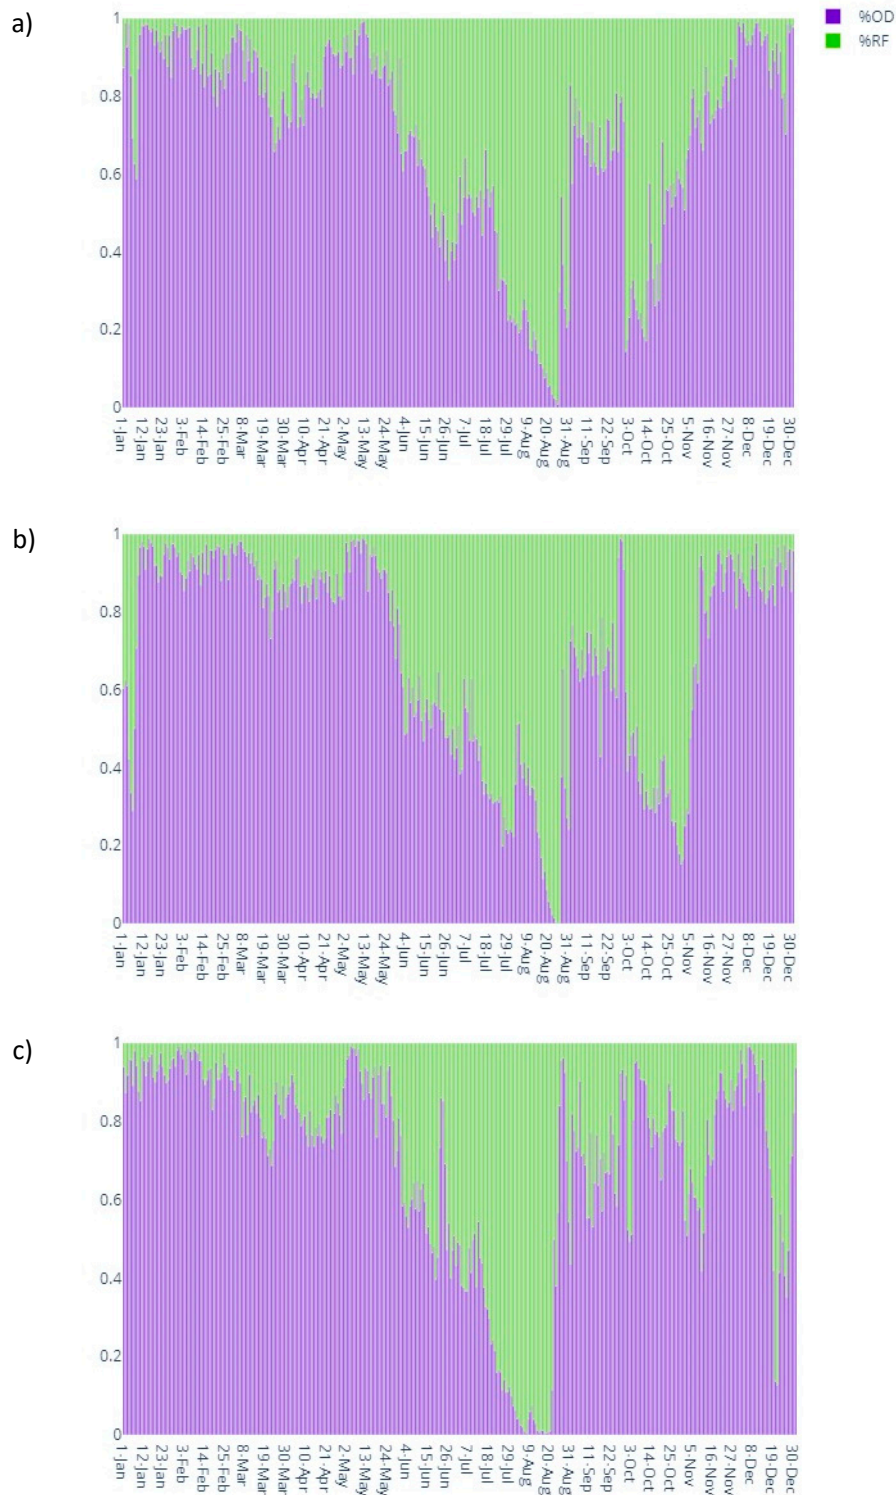

**Figure S5.** Barchart showing the normalized fraction (expressed in %) of discharge that has been optimized for abstraction (purple 'OD' bars) with respect to the natural flow (green 'RF' bars) at the daily scale. The diverted discharge is calculated as a daily average for all the 10 runs of the model for each scenario. **Results for DP2** under dry (a), normal (b) and wet (c) scenarios.



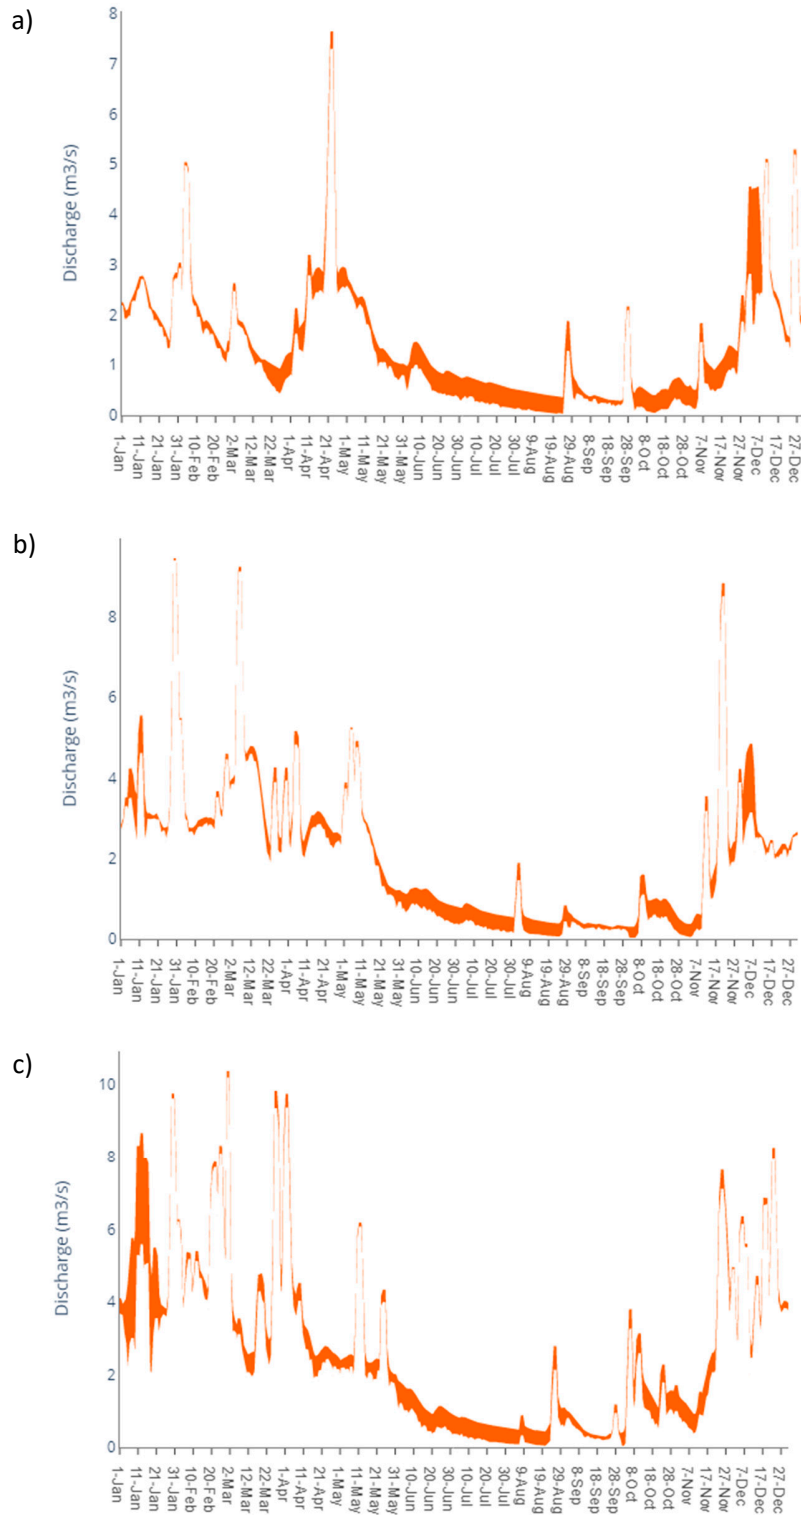

**Figure S6.** Flow series showing the magnitude of gap between the daily optimized diverted discharges in  $\text{m}^3/\text{s}$  with respect to the natural discharge. Greater thickness indicates the highest trade-off between the natural discharge and water for municipal use. **Results for DP1** under dry (a), normal (b) and wet (c) scenarios.

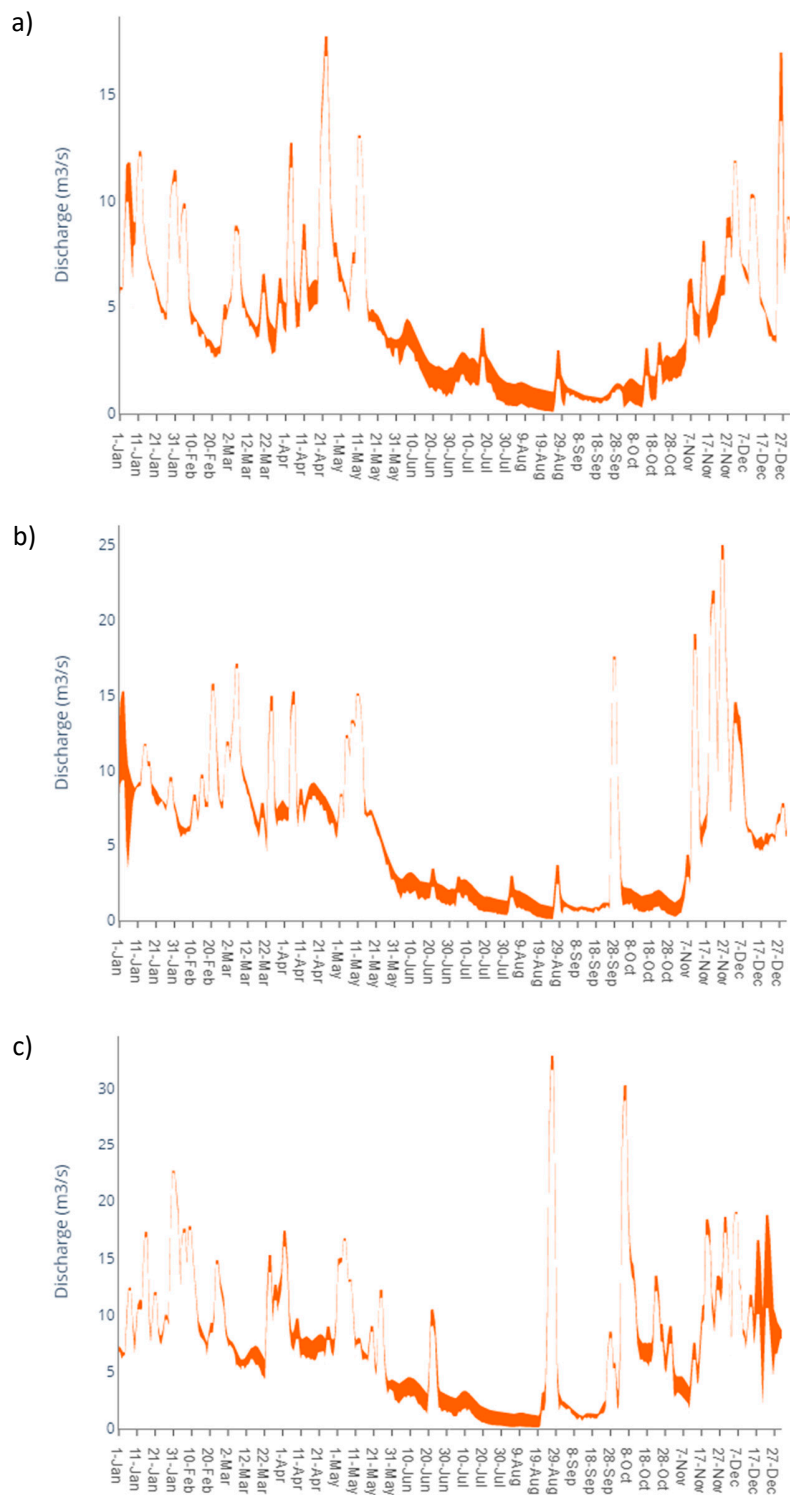

**Figure S7.** Flow series showing the magnitude of gap between the daily optimized diverted discharges in  $\text{m}^3/\text{s}$  with respect to the natural discharge. Greater thickness indicates the highest trade-off between the natural discharge and water for municipal use. **Results for DP2** under dry (a), normal (b) and wet (c) scenarios.

**Table S1** Average objective function score (municipal water demand), for each simulation run (1-10). The score indicate the achievement of the objective (minus sign) and the ratio of the resulting supply after optimization to the required supply (i.e. the proportion of existing water for human consumption with respect to demanded water; AVG, MIN and MAX values refer to the average, minimum and maximum value for each set, respectively. **Results for the DP1** under dry, normal and wet scenarios.

| <i>DP1</i> |         |         |         |
|------------|---------|---------|---------|
| RUN:       | Dry     | Normal  | Wet     |
| 1          | -134.14 | -209.57 | -266.20 |
| 2          | -134.34 | -204.36 | -271.45 |
| 3          | -136.62 | -208.30 | -268.61 |
| 4          | -137.05 | -209.96 | -263.14 |
| 5          | -134.76 | -209.25 | -273.09 |
| 6          | -133.21 | -210.18 | -264.93 |
| 7          | -132.31 | -212.78 | -268.04 |
| 8          | -127.97 | -208.82 | -272.77 |
| 9          | -129.91 | -206.23 | -264.72 |
| 10         | -133.64 | -208.50 | -275.35 |
| AVG        | -133.40 | -208.79 | -268.83 |
| MIN        | -127.97 | -204.36 | -263.14 |
| MAX        | -137    | -213    | -275    |

**Table S2** Average objective function score (municipal water demand), for each simulation run (1-10). The score indicate the achievement of the objective (minus sign) and the ratio of the resulting supply after optimization to the required supply (i.e. the proportion of existing water for human consumption with respect to demanded water; AVG, MIN and MAX values refer to the average, minimum and maximum value for each set, respectively. **Results for the DP2** under dry, normal and wet scenarios.

| <i>DP2</i> |         |         |         |
|------------|---------|---------|---------|
| RUN:       | Dry     | Normal  | Wet     |
| 1          | -172.09 | -234.62 | -299.99 |
| 2          | -170.52 | -234.34 | -296.80 |
| 3          | -175.62 | -228.17 | -298.36 |
| 4          | -171.66 | -232.57 | -298.00 |
| 5          | -173.92 | -231.20 | -295.49 |
| 6          | -173.71 | -231.62 | -293.23 |
| 7          | -174.54 | -227.52 | -288.43 |
| 8          | -172.89 | -231.38 | -295.89 |
| 9          | -173.13 | -231.16 | -291.14 |
| 10         | -171.13 | -227.95 | -295.75 |
| AVG        | -172.92 | -231.05 | -295.31 |
| MIN        | -170.52 | -227.52 | -288.43 |
| MAX        | -176    | -235    | -300    |



| <i>Dry Scenario – DP1</i> |      |      |      |      |    |      |
|---------------------------|------|------|------|------|----|------|
| RUN:                      | R1   | R2   | R3   | R4   | R5 | R6   |
| 1                         | 0.01 | 0.79 | 0.24 | 0.01 | 0  | 0.10 |
| 2                         | 0.01 | 0.79 | 0.20 | 0.01 | 0  | 0.07 |
| 3                         | 0.02 | 0.75 | 0.20 | 0.01 | 0  | 0.11 |
| 4                         | 0.01 | 0.80 | 0.20 | 0.01 | 0  | 0.08 |
| 5                         | 0.01 | 0.79 | 0.17 | 0.01 | 0  | 0.10 |
| 6                         | 0.01 | 0.79 | 0.23 | 0.01 | 0  | 0.07 |
| 7                         | 0.01 | 0.80 | 0.31 | 0.01 | 0  | 0.11 |
| 8                         | 0.01 | 0.80 | 0.25 | 0.01 | 0  | 0.13 |
| 9                         | 0.01 | 0.83 | 0.21 | 0.01 | 0  | 0.10 |
| 10                        | 0.01 | 0.75 | 0.19 | 0.01 | 0  | 0.07 |
| TEST                      | 0    | 0.67 | 0    | 0    | 0  | 0    |
| AVG                       | 0.01 | 0.79 | 0.22 | 0.01 | 0  | 0.09 |
| MIN                       | 0.01 | 0.75 | 0.17 | 0.01 | 0  | 0.07 |
| MAX                       | 0.02 | 0.83 | 0.31 | 0.01 | 0  | 0.13 |

| <i>Normal Scenario – DP1</i> |      |      |      |      |    |      |
|------------------------------|------|------|------|------|----|------|
| RUN:                         | R1   | R2   | R3   | R4   | R5 | R6   |
| 1                            | 0.01 | 0.73 | 0.17 | 0.01 | 0  | 0.08 |
| 2                            | 0.02 | 0.63 | 0.15 | 0.01 | 0  | 0.07 |
| 3                            | 0.02 | 0.73 | 0.24 | 0.00 | 0  | 0.12 |
| 4                            | 0.02 | 0.68 | 0.14 | 0.01 | 0  | 0.06 |
| 5                            | 0.03 | 0.75 | 0.21 | 0.01 | 0  | 0.10 |
| 6                            | 0.02 | 0.72 | 0.19 | 0.01 | 0  | 0.08 |
| 7                            | 0.02 | 0.73 | 0.12 | 0.01 | 0  | 0.08 |
| 8                            | 0.01 | 0.67 | 0.18 | 0.01 | 0  | 0.06 |
| 9                            | 0.02 | 0.66 | 0.19 | 0.01 | 0  | 0.08 |
| 10                           | 0.02 | 0.69 | 0.15 | 0.00 | 0  | 0.05 |
| TEST                         | 0    | 0.10 | 0    | 0    | 0  | 0    |
| AVG                          | 0.02 | 0.70 | 0.17 | 0.01 | 0  | 0.08 |
| MIN                          | 0.01 | 0.63 | 0.12 | 0    | 0  | 0.05 |
| MAX                          | 0.03 | 0.75 | 0.24 | 0.01 | 0  | 0.12 |

| <i>Wet Scenario – DP1</i> |      |      |      |      |    |      |
|---------------------------|------|------|------|------|----|------|
| RUN:                      | R1   | R2   | R3   | R4   | R5 | R6   |
| 1                         | 0.01 | 0.28 | 0.18 | 0.01 | 0  | 0.02 |
| 2                         | 0.01 | 0.39 | 0.19 | 0.01 | 0  | 0.08 |
| 3                         | 0.01 | 0.26 | 0.15 | 0.01 | 0  | 0.01 |
| 4                         | 0.01 | 0.26 | 0.12 | 0.00 | 0  | 0.04 |
| 5                         | 0.01 | 0.32 | 0.17 | 0.01 | 0  | 0.04 |
| 6                         | 0.01 | 0.35 | 0.14 | 0.00 | 0  | 0.03 |
| 7                         | 0.01 | 0.16 | 0.17 | 0.01 | 0  | 0.09 |
| 8                         | 0.02 | 0.25 | 0.22 | 0.01 | 0  | 0    |
| 9                         | 0.01 | 0.30 | 0.15 | 0.00 | 0  | 0.06 |
| 10                        | 0.01 | 0.42 | 0.16 | 0.01 | 0  | 0.04 |
| TEST                      | 0    | 0    | 0    | 0    | 0  | 0    |
| AVG                       | 0.01 | 0.30 | 0.17 | 0.01 | 0  | 0.04 |
| MIN                       | 0.01 | 0.16 | 0.12 | 0    | 0  | 0    |
| MAX                       | 0.02 | 0.42 | 0.22 | 0.01 | 0  | 0.09 |

**Tables S3-S4-S5** Average objective function scores (R1-R6), for each simulation run (1-10). TEST values refer to the test runs on the undisturbed hydrograph; AVG, MIN and MAX values refer to the average, minimum and maximum value for each set, respectively. **Results for the DP1** under dry, normal and wet scenarios.

| <i>Dry Scenario – DP2</i> |      |      |      |      |    |      |
|---------------------------|------|------|------|------|----|------|
| RUN:                      | R1   | R2   | R3   | R4   | R5 | R6   |
| 1                         | 0.03 | 0.91 | 0.26 | 0.01 | 0  | 0.13 |
| 2                         | 0.02 | 0.84 | 0.22 | 0.01 | 0  | 0.08 |
| 3                         | 0.03 | 0.92 | 0.26 | 0.01 | 0  | 0.10 |
| 4                         | 0.02 | 0.82 | 0.22 | 0.01 | 0  | 0.08 |
| 5                         | 0.02 | 0.90 | 0.26 | 0.01 | 0  | 0.08 |
| 6                         | 0.02 | 0.90 | 0.26 | 0.01 | 0  | 0.11 |
| 7                         | 0.02 | 0.91 | 0.27 | 0.01 | 0  | 0.10 |
| 8                         | 0.02 | 0.91 | 0.22 | 0.01 | 0  | 0.09 |
| 9                         | 0.04 | 0.87 | 0.25 | 0.01 | 0  | 0.09 |
| 10                        | 0.01 | 0.87 | 0.27 | 0.01 | 0  | 0.10 |
| TEST                      | 0    | 0.76 | 0    | 0    | 0  | 0    |
| AVG                       | 0.02 | 0.88 | 0.25 | 0.01 | 0  | 0.10 |
| MIN                       | 0.01 | 0.82 | 0.22 | 0.01 | 0  | 0.08 |
| MAX                       | 0.04 | 0.92 | 0.27 | 0.01 | 0  | 0.13 |

| <i>Normal Scenario – DP2</i> |      |      |      |      |    |      |
|------------------------------|------|------|------|------|----|------|
| RUN:                         | R1   | R2   | R3   | R4   | R5 | R6   |
| 1                            | 0.01 | 0.63 | 0.15 | 0    | 0  | 0.06 |
| 2                            | 0.01 | 0.77 | 0.20 | 0.01 | 0  | 0.03 |
| 3                            | 0.01 | 0.71 | 0.24 | 0.01 | 0  | 0.06 |
| 4                            | 0.01 | 0.79 | 0.20 | 0.01 | 0  | 0.08 |
| 5                            | 0.01 | 0.65 | 0.16 | 0    | 0  | 0.06 |
| 6                            | 0.01 | 0.75 | 0.16 | 0    | 0  | 0.05 |
| 7                            | 0.02 | 0.71 | 0.16 | 0    | 0  | 0.10 |
| 8                            | 0.02 | 0.75 | 0.24 | 0.01 | 0  | 0.07 |
| 9                            | 0.02 | 0.73 | 0.18 | 0    | 0  | 0.10 |
| 10                           | 0.01 | 0.72 | 0.16 | 0    | 0  | 0.06 |
| TEST                         | 0    | 0    | 0    | 0    | 0  | 0    |
| AVG                          | 0.01 | 0.72 | 0.19 | 0    | 0  | 0.07 |
| MIN                          | 0.01 | 0.63 | 0.15 | 0    | 0  | 0.03 |
| MAX                          | 0.02 | 0.79 | 0.24 | 0.01 | 0  | 0.10 |

| <i>Wet Scenario – DP2</i> |      |      |      |      |    |      |
|---------------------------|------|------|------|------|----|------|
| RUN:                      | R1   | R2   | R3   | R4   | R5 | R6   |
| 1                         | 0.02 | 0.56 | 0.19 | 0.01 | 0  | 0.06 |
| 2                         | 0.02 | 0.56 | 0.18 | 0.02 | 0  | 0.10 |
| 3                         | 0.02 | 0.56 | 0.22 | 0.01 | 0  | 0.09 |
| 4                         | 0.02 | 0.61 | 0.16 | 0.01 | 0  | 0.07 |
| 5                         | 0.01 | 0.53 | 0.16 | 0.02 | 0  | 0.03 |
| 6                         | 0.01 | 0.55 | 0.16 | 0.02 | 0  | 0.08 |
| 7                         | 0.02 | 0.49 | 0.16 | 0.02 | 0  | 0.05 |
| 8                         | 0.01 | 0.47 | 0.16 | 0.01 | 0  | 0    |
| 9                         | 0.02 | 0.55 | 0.18 | 0.02 | 0  | 0.08 |
| 10                        | 0.01 | 0.57 | 0.14 | 0.01 | 0  | 0.04 |
| TEST                      | 0    | 0.10 | 0    | 0.01 | 0  | 0    |
| AVG                       | 0.02 | 0.54 | 0.17 | 0.02 | 0  | 0.06 |
| MIN                       | 0.01 | 0.47 | 0.14 | 0.01 | 0  | 0.01 |
| MAX                       | 0.02 | 0.61 | 0.22 | 0.02 | 0  | 0.10 |

**Tables S6-S7-S8** Average objective function scores (R1-R6), for each simulation run (1-10). TEST values refer to the test runs on the undisturbed hydrograph; AVG, MIN and MAX values refer to the average, minimum and maximum value for each set, respectively. **Results for the DP2** under dry, normal and wet scenarios.

**Table S9.** Comparison of average natural discharge values under different scenarios and the optimized discharge thresholds. **Results for DP1** for sub-normal (dry), normal and above-normal (wet) hydrological conditions.

|   |   | 1-Jan   |           | 2-Jan   |           | 3-Jan   |           | 4-Jan   |           | 5-Jan   |           | 6-Jan   |           | 7-Jan   |           | 8-Jan   |           |
|---|---|---------|-----------|---------|-----------|---------|-----------|---------|-----------|---------|-----------|---------|-----------|---------|-----------|---------|-----------|
|   |   | Natural | Optimized |
| S | D | 2.2457  | 2.1846    | 2.1433  | 1.8893    | 2.0454  | 1.9004    | 2.0744  | 1.8983    | 2.1038  | 1.9532    | 2.2377  | 1.9403    | 2.3526  | 2.2639    | 2.4065  | 2.2354    |
|   | N | 2.7257  | 2.5988    | 2.8858  | 2.7747    | 3.0020  | 2.9284    | 3.5120  | 3.2989    | 3.3890  | 2.8362    | 4.2324  | 3.4977    | 4.0577  | 3.1257    | 3.6905  | 2.7677    |
|   | W | 4.0957  | 3.6503    | 3.9504  | 3.6157    | 3.8874  | 3.1336    | 3.9807  | 2.8495    | 4.0785  | 2.0469    | 4.4813  | 2.1496    | 5.3042  | 2.8360    | 5.7497  | 2.9976    |

|   |   | 9-Jan   |           | 10-Jan  |           | 11-Jan  |           | 12-Jan  |           | 13-Jan  |           | 14-Jan  |           | 15-Jan  |           | 16-Jan  |           |
|---|---|---------|-----------|---------|-----------|---------|-----------|---------|-----------|---------|-----------|---------|-----------|---------|-----------|---------|-----------|
|   |   | Natural | Optimized |
| S | D | 2.5010  | 2.2804    | 2.6441  | 2.4805    | 2.7434  | 2.5225    | 2.7498  | 2.7045    | 2.6533  | 2.5293    | 2.4970  | 2.3146    | 2.3187  | 2.1072    | 2.1662  | 2.0953    |
|   | N | 3.5470  | 2.3170    | 3.3036  | 2.0606    | 5.1130  | 4.1108    | 5.5450  | 4.6118    | 3.6366  | 2.8122    | 3.1876  | 2.2244    | 3.0762  | 2.5357    | 3.0982  | 2.9497    |
|   | W | 5.2748  | 2.3948    | 5.8818  | 2.6661    | 8.3126  | 5.2834    | 7.9577  | 4.8709    | 8.6646  | 5.5866    | 7.4207  | 4.3734    | 7.9668  | 4.9955    | 7.8124  | 5.0218    |

|   |   | 17-Jan  |           | 18-Jan  |           | 19-Jan  |           | 20-Jan  |           | 21-Jan  |           | 22-Jan  |           | 23-Jan  |           | 24-Jan  |           |
|---|---|---------|-----------|---------|-----------|---------|-----------|---------|-----------|---------|-----------|---------|-----------|---------|-----------|---------|-----------|
|   |   | Natural | Optimized |
| S | D | 2.0903  | 1.9933    | 2.0629  | 1.7733    | 2.0046  | 1.8911    | 1.9389  | 1.7969    | 1.9009  | 1.7150    | 1.8231  | 1.7513    | 1.7440  | 1.4668    | 1.6489  | 1.5638    |
|   | N | 3.0693  | 2.9415    | 3.0364  | 2.9618    | 3.0362  | 2.9638    | 3.0741  | 2.9348    | 2.9680  | 2.9399    | 2.8365  | 2.6765    | 2.7691  | 2.5664    | 2.7226  | 2.6797    |
|   | W | 5.1039  | 2.1016    | 4.6233  | 1.9139    | 4.4915  | 2.1019    | 5.4905  | 3.1103    | 5.2642  | 3.5485    | 4.1717  | 3.0730    | 3.9054  | 3.1361    | 3.8537  | 3.5267    |

|   |   | 25-Jan  |           | 26-Jan  |           | 27-Jan  |           | 28-Jan  |           | 29-Jan  |           | 30-Jan  |           | 31-Jan  |           | 1-Feb   |           |
|---|---|---------|-----------|---------|-----------|---------|-----------|---------|-----------|---------|-----------|---------|-----------|---------|-----------|---------|-----------|
|   |   | Natural | Optimized |
| S | D | 1.5372  | 1.2378    | 1.4531  | 1.3302    | 1.4448  | 1.1845    | 1.8039  | 1.6777    | 2.7335  | 2.6275    | 2.8264  | 2.7202    | 2.7729  | 2.6280    | 3.0338  | 2.9273    |
|   | N | 2.7416  | 2.4143    | 2.7412  | 2.5030    | 2.7675  | 2.6941    | 3.3228  | 3.1733    | 5.5054  | 5.2479    | 9.4489  | 9.4023    | 7.9027  | 7.8307    | 4.8705  | 4.7677    |
|   | W | 3.8096  | 3.6158    | 3.7796  | 3.5623    | 3.7455  | 3.5272    | 4.1740  | 3.9836    | 6.1210  | 6.0033    | 9.7584  | 9.6226    | 8.0067  | 7.8115    | 4.8312  | 4.7028    |

|   |   | 2-Feb   |           | 3-Feb   |           | 4-Feb   |           | 5-Feb   |           | 6-Feb   |           | 7-Feb   |           | 8-Feb   |           | 9-Feb   |           |
|---|---|---------|-----------|---------|-----------|---------|-----------|---------|-----------|---------|-----------|---------|-----------|---------|-----------|---------|-----------|
|   |   | Natural | Optimized |
| S | D | 2.3299  | 2.1615    | 2.6257  | 2.5223    | 5.0380  | 4.9700    | 4.8862  | 4.8125    | 3.0920  | 2.7716    | 2.4365  | 2.2676    | 2.3206  | 2.1576    | 2.2627  | 2.1551    |
|   | N | 5.4828  | 5.4410    | 4.2542  | 4.1289    | 3.1529  | 2.9823    | 3.0167  | 2.9214    | 2.7432  | 2.5975    | 2.7265  | 2.6328    | 2.7367  | 2.6377    | 2.7323  | 2.5280    |
|   | W | 6.2687  | 6.2099    | 5.8129  | 5.5684    | 3.7022  | 3.5933    | 3.8839  | 3.6679    | 4.3662  | 4.2866    | 5.3304  | 4.8475    | 5.3152  | 5.1691    | 4.3391  | 4.1022    |

|   |   | 10-Feb  |           | 11-Feb  |           | 12-Feb  |           | 13-Feb  |           | 14-Feb  |           | 15-Feb  |           | 16-Feb  |           | 17-Feb  |           |
|---|---|---------|-----------|---------|-----------|---------|-----------|---------|-----------|---------|-----------|---------|-----------|---------|-----------|---------|-----------|
|   |   | Natural | Optimized |
| S | D | 2.1789  | 1.7532    | 2.0706  | 1.9560    | 1.9471  | 1.7069    | 1.8450  | 1.5966    | 1.8323  | 1.5746    | 1.8646  | 1.7148    | 1.8310  | 1.6593    | 1.7567  | 1.4857    |
|   | N | 2.7748  | 2.5469    | 2.8257  | 2.6675    | 2.9202  | 2.7541    | 2.9483  | 2.7631    | 2.9515  | 2.7310    | 2.9849  | 2.8129    | 2.9948  | 2.8393    | 2.9688  | 2.6983    |
|   | W | 4.2963  | 4.1121    | 4.7142  | 4.6346    | 5.3922  | 5.1212    | 4.8747  | 4.4965    | 4.7773  | 4.6454    | 4.6769  | 4.2442    | 4.5356  | 4.0281    | 4.3590  | 4.0365    |

|   |   | 18-Feb  |           | 19-Feb  |           | 20-Feb  |           | 21-Feb  |           | 22-Feb  |           | 23-Feb  |           | 24-Feb  |           | 25-Feb  |           |
|---|---|---------|-----------|---------|-----------|---------|-----------|---------|-----------|---------|-----------|---------|-----------|---------|-----------|---------|-----------|
|   |   | Natural | Optimized |
| S | D | 1.6960  | 1.6174    | 1.6287  | 1.4703    | 1.5475  | 1.3316    | 1.4691  | 1.3115    | 1.3885  | 1.3075    | 1.3384  | 1.1483    | 1.2800  | 1.0989    | 1.2299  | 1.0425    |
|   | N | 2.9843  | 2.8294    | 2.9649  | 2.7627    | 2.8767  | 2.6662    | 2.9847  | 2.7455    | 3.6617  | 3.5198    | 3.2472  | 3.0815    | 3.1388  | 2.9632    | 3.0695  | 2.9018    |
|   | W | 4.2002  | 3.8052    | 4.4525  | 4.2936    | 6.8628  | 6.6463    | 7.7321  | 7.5169    | 7.8569  | 7.7044    | 6.6866  | 6.3663    | 7.1229  | 6.9606    | 8.3145  | 8.1050    |

|   |   | 26-Feb  |           | 27-Feb  |           | 28-Feb  |           | 1-Mar   |           | 2-Mar   |           | 3-Mar   |           | 4-Mar   |           | 5-Mar   |           |
|---|---|---------|-----------|---------|-----------|---------|-----------|---------|-----------|---------|-----------|---------|-----------|---------|-----------|---------|-----------|
|   |   | Natural | Optimized |
| S | D | 1.2391  | 0.9494    | 1.4572  | 1.2359    | 1.4838  | 1.2683    | 1.9269  | 1.7973    | 2.6294  | 2.4707    | 1.9782  | 1.8033    | 1.8700  | 1.7712    | 1.8552  | 1.7623    |
|   | N | 3.8954  | 3.6264    | 4.5971  | 4.4568    | 3.7831  | 3.6288    | 3.8788  | 3.6245    | 3.9498  | 3.8355    | 3.9845  | 3.7092    | 4.0828  | 3.9404    | 7.7321  | 7.6262    |
|   | W | 6.3479  | 6.2182    | 5.0231  | 4.6862    | 4.0565  | 3.8330    | 10.3852 | 10.2033   | 4.8606  | 4.6667    | 3.7878  | 3.0214    | 3.5188  | 3.1853    | 3.3865  | 3.1068    |

|   |   | 6-Mar   |           | 7-Mar   |           | 8-Mar   |           | 9-Mar   |           | 10-Mar  |           | 11-Mar  |           | 12-Mar  |           | 13-Mar  |           |
|---|---|---------|-----------|---------|-----------|---------|-----------|---------|-----------|---------|-----------|---------|-----------|---------|-----------|---------|-----------|
|   |   | Natural | Optimized |
| S | D | 1.8351  | 1.7110    | 1.7558  | 1.5989    | 1.6461  | 1.5693    | 1.5275  | 1.3506    | 1.4302  | 1.2748    | 1.3468  | 1.1641    | 1.2867  | 1.0584    | 1.2403  | 0.8879    |
|   | N | 9.2405  | 9.1255    | 6.2896  | 6.1797    | 4.7358  | 4.5815    | 4.4838  | 4.2799    | 4.5837  | 4.3900    | 4.7050  | 4.4228    | 4.7584  | 4.5868    | 4.7488  | 4.4044    |
|   | W | 3.2463  | 2.7128    | 3.5411  | 3.1117    | 3.2693  | 2.6859    | 2.8010  | 2.3862    | 2.6518  | 2.1956    | 2.5687  | 1.9402    | 2.5129  | 2.0524    | 2.5511  | 1.9505    |

|   |   | 14-Mar  |           | 15-Mar  |           | 16-Mar  |           | 17-Mar  |           | 18-Mar  |           | 19-Mar  |           | 20-Mar  |           | 21-Mar  |           |
|---|---|---------|-----------|---------|-----------|---------|-----------|---------|-----------|---------|-----------|---------|-----------|---------|-----------|---------|-----------|
|   |   | Natural | Optimized |
| S | D | 1.2050  | 1.0028    | 1.1464  | 1.0387    | 1.0929  | 1.0237    | 1.0898  | 0.8689    | 1.0895  | 0.8221    | 1.0589  | 0.7215    | 1.0249  | 0.6807    | 1.0125  | 0.6043    |
|   | N | 4.6397  | 4.3841    | 4.4370  | 4.1468    | 4.1289  | 3.8230    | 3.7565  | 3.4192    | 3.3687  | 2.9568    | 3.0065  | 2.6092    | 2.6932  | 2.1402    | 2.4458  | 2.0502    |
|   | W | 2.5805  | 1.8907    | 2.5928  | 1.9580    | 2.6182  | 2.0729    | 3.8398  | 3.0413    | 4.7201  | 4.2871    | 4.7389  | 4.0422    | 4.4773  | 3.9502    | 3.3369  | 2.7170    |

|   |   | 22-Mar  |           | 23-Mar  |           | 24-Mar  |           | 25-Mar  |           | 26-Mar  |           | 27-Mar  |           | 28-Mar  |           | 29-Mar  |           |
|---|---|---------|-----------|---------|-----------|---------|-----------|---------|-----------|---------|-----------|---------|-----------|---------|-----------|---------|-----------|
|   |   | Natural | Optimized |
| S | D | 0.9889  | 0.5625    | 0.9629  | 0.5455    | 0.9328  | 0.4566    | 0.9074  | 0.4478    | 0.9028  | 0.3963    | 0.9168  | 0.4269    | 1.0007  | 0.5031    | 1.1135  | 0.6229    |
|   | N | 2.2428  | 1.8233    | 2.1380  | 1.7384    | 3.5815  | 3.2576    | 4.2546  | 3.8926    | 2.6734  | 2.2019    | 2.4522  | 2.1181    | 2.4809  | 2.1075    | 2.5173  | 2.1171    |
|   | W | 3.0397  | 2.4878    | 2.9286  | 2.1800    | 2.9292  | 2.2443    | 3.0729  | 2.5244    | 5.4967  | 4.9826    | 9.8397  | 9.3603    | 9.1007  | 8.6996    | 5.2282  | 4.4390    |

|   |   | 30-Mar  |           | 31-Mar  |           | 1-Apr   |           | 2-Apr   |           | 3-Apr   |           | 4-Apr   |           | 5-Apr   |           | 6-Apr   |           |
|---|---|---------|-----------|---------|-----------|---------|-----------|---------|-----------|---------|-----------|---------|-----------|---------|-----------|---------|-----------|
|   |   | Natural | Optimized |
| S | D | 1.1724  | 0.7060    | 1.2093  | 0.7360    | 1.2300  | 0.7719    | 1.2265  | 0.6805    | 1.5702  | 1.1286    | 2.1318  | 1.6219    | 1.7166  | 1.2112    | 1.7124  | 1.2804    |
|   | N | 3.5561  | 3.2268    | 4.2470  | 3.9301    | 2.7751  | 2.3947    | 2.4750  | 2.0608    | 2.7116  | 2.3252    | 3.1760  | 2.8659    | 5.1577  | 4.8219    | 5.0128  | 4.7083    |
|   | W | 4.2594  | 3.7081    | 5.1398  | 4.5225    | 8.5446  | 8.0997    | 9.7488  | 9.3749    | 7.2017  | 6.7654    | 5.1247  | 4.7419    | 4.4137  | 3.8631    | 4.2165  | 3.6865    |

|   |   | 7-Apr   |           | 8-Apr   |           | 9-Apr   |           | 10-Apr  |           | 11-Apr  |           | 12-Apr  |           | 13-Apr  |           | 14-Apr  |           |
|---|---|---------|-----------|---------|-----------|---------|-----------|---------|-----------|---------|-----------|---------|-----------|---------|-----------|---------|-----------|
|   |   | Natural | Optimized |
| S | D | 1.7675  | 1.2464    | 1.8410  | 1.1770    | 1.8819  | 1.4562    | 2.3848  | 1.9202    | 3.1947  | 2.7851    | 2.7022  | 2.2514    | 2.7034  | 2.2691    | 2.8221  | 2.3133    |
|   | N | 2.9113  | 2.5314    | 2.4818  | 2.0884    | 2.3678  | 2.0116    | 2.4019  | 1.9345    | 2.5613  | 2.1556    | 2.7267  | 2.3511    | 2.9369  | 2.5568    | 3.0412  | 2.7156    |
|   | W | 4.0520  | 3.4755    | 4.3254  | 3.6957    | 4.5149  | 4.0304    | 3.6057  | 3.1328    | 3.3386  | 2.8413    | 3.2727  | 2.6069    | 3.1950  | 2.6803    | 3.0212  | 2.3340    |

|   |   | 15-Apr  |           | 16-Apr  |           | 17-Apr  |           | 18-Apr  |           | 19-Apr  |           | 20-Apr  |           | 21-Apr  |           | 22-Apr  |           |
|---|---|---------|-----------|---------|-----------|---------|-----------|---------|-----------|---------|-----------|---------|-----------|---------|-----------|---------|-----------|
|   |   | Natural | Optimized |
| S | D | 2.9033  | 2.4362    | 2.9209  | 2.3940    | 2.8773  | 2.4752    | 2.8296  | 2.3929    | 2.7812  | 2.3686    | 3.5949  | 2.9067    | 4.5688  | 4.1575    | 6.2074  | 5.8086    |
|   | N | 3.0388  | 2.7510    | 3.0782  | 2.7277    | 3.1415  | 2.8127    | 3.1201  | 2.8216    | 3.0551  | 2.7266    | 2.9884  | 2.6976    | 2.8780  | 2.4175    | 2.7835  | 2.4980    |
|   | W | 2.8019  | 2.3687    | 2.6040  | 1.8927    | 2.4935  | 1.8581    | 2.4752  | 1.9350    | 2.5067  | 1.8302    | 2.5557  | 2.1054    | 2.6438  | 2.0407    | 2.7200  | 2.3296    |

|   |   | 23-Apr  |           | 24-Apr  |           | 25-Apr  |           | 26-Apr  |           | 27-Apr  |           | 28-Apr  |           | 29-Apr  |           | 30-Apr  |           |
|---|---|---------|-----------|---------|-----------|---------|-----------|---------|-----------|---------|-----------|---------|-----------|---------|-----------|---------|-----------|
|   |   | Natural | Optimized |
| S | D | 7.6451  | 7.2982    | 5.2255  | 4.7843    | 2.9874  | 2.6167    | 2.7398  | 2.2348    | 2.8129  | 2.4347    | 2.9078  | 2.4960    | 2.9310  | 2.5315    | 2.9092  | 2.4895    |
|   | N | 2.7315  | 2.3173    | 2.6706  | 2.2964    | 2.5915  | 2.1842    | 2.6099  | 2.2523    | 2.6156  | 2.3667    | 2.5904  | 2.3989    | 2.4957  | 2.2571    | 2.4324  | 2.3611    |
|   | W | 2.7520  | 2.1397    | 2.7340  | 2.4188    | 2.6634  | 2.3160    | 2.6161  | 2.2163    | 2.5629  | 1.9677    | 2.5442  | 2.2191    | 2.5026  | 2.0484    | 2.4360  | 2.1422    |

|   |   | 1-May   |           | 2-May   |           | 3-May   |           | 4-May   |           | 5-May   |           | 6-May   |           | 7-May   |           | 8-May   |           |
|---|---|---------|-----------|---------|-----------|---------|-----------|---------|-----------|---------|-----------|---------|-----------|---------|-----------|---------|-----------|
|   |   | Natural | Optimized |
| S | D | 2.7138  | 2.5419    | 2.6506  | 2.4860    | 2.5827  | 2.4072    | 2.4783  | 2.3087    | 2.3978  | 2.1972    | 2.3197  | 2.0250    | 2.2808  | 2.1030    | 2.3334  | 2.1707    |
|   | N | 3.1635  | 3.0252    | 3.8837  | 3.7369    | 2.9030  | 2.5071    | 3.8709  | 3.7300    | 5.2409  | 5.2082    | 4.0821  | 3.8715    | 3.5883  | 3.4438    | 4.9160  | 4.7618    |
|   | W | 2.3502  | 1.6832    | 2.3861  | 2.1561    | 2.4353  | 2.1567    | 2.4448  | 2.0616    | 2.4626  | 2.1454    | 2.5133  | 1.8130    | 2.5227  | 2.2136    | 2.4839  | 1.9123    |

|   |   | 9-May   |           | 10-May  |           | 11-May  |           | 12-May  |           | 13-May  |           | 14-May  |           | 15-May  |           | 16-May  |           |
|---|---|---------|-----------|---------|-----------|---------|-----------|---------|-----------|---------|-----------|---------|-----------|---------|-----------|---------|-----------|
|   |   | Natural | Optimized |
| S | D | 2.3418  | 2.1223    | 2.2832  | 1.9792    | 2.1570  | 1.7666    | 2.0187  | 1.7829    | 1.8594  | 1.6843    | 1.6982  | 1.4351    | 1.5648  | 1.2891    | 1.4832  | 1.2267    |
|   | N | 4.3161  | 4.2624    | 3.2593  | 3.0810    | 3.0110  | 2.8955    | 2.9164  | 2.8392    | 2.8508  | 2.6455    | 2.7193  | 2.5838    | 2.5489  | 2.3472    | 2.3570  | 2.2603    |
|   | W | 2.4126  | 1.9026    | 3.3885  | 3.2422    | 5.8453  | 5.7284    | 6.1771  | 6.0711    | 4.3380  | 4.1463    | 2.6098  | 1.9748    | 2.3287  | 1.8978    | 2.2972  | 1.6976    |

|   |   | 17-May  |           | 18-May  |           | 19-May  |           | 20-May  |           | 21-May  |           | 22-May  |           | 23-May  |           | 24-May  |           |
|---|---|---------|-----------|---------|-----------|---------|-----------|---------|-----------|---------|-----------|---------|-----------|---------|-----------|---------|-----------|
|   |   | Natural | Optimized |
| S | D | 1.3927  | 0.9566    | 1.3191  | 0.9003    | 1.3008  | 1.0495    | 1.3070  | 0.9848    | 1.2713  | 1.0507    | 1.2141  | 0.9113    | 1.1538  | 0.8534    | 1.1014  | 0.9636    |
|   | N | 2.1797  | 1.8496    | 2.0690  | 1.7609    | 1.9567  | 1.8036    | 1.8237  | 1.4978    | 1.6786  | 1.1971    | 1.5440  | 1.3041    | 1.4298  | 1.1362    | 1.3394  | 1.0341    |
|   | W | 2.2908  | 2.0487    | 2.2990  | 1.9631    | 2.3189  | 1.6315    | 2.3742  | 1.8706    | 2.4060  | 1.6735    | 2.3892  | 2.1036    | 2.3382  | 1.9003    | 4.1688  | 3.8970    |

|   |   | 25-May  |           | 26-May  |           | 27-May  |           | 28-May  |           | 29-May  |           | 30-May  |           | 31-May  |           | 1-Jun   |           |
|---|---|---------|-----------|---------|-----------|---------|-----------|---------|-----------|---------|-----------|---------|-----------|---------|-----------|---------|-----------|
|   |   | Natural | Optimized |
| S | D | 1.0714  | 0.8158    | 1.0457  | 0.7413    | 1.0246  | 0.7308    | 1.0129  | 0.6806    | 1.0026  | 0.6757    | 1.0004  | 0.7398    | 1.0023  | 0.7887    | 0.9749  | 0.5622    |
|   | N | 1.2874  | 1.0722    | 1.2610  | 1.0725    | 1.2297  | 1.0359    | 1.1894  | 0.9172    | 1.1714  | 0.6546    | 1.1813  | 0.7844    | 1.1796  | 0.9189    | 1.1385  | 0.6819    |
|   | W | 4.3294  | 3.9871    | 2.7078  | 2.2649    | 2.2203  | 1.7182    | 2.0798  | 1.5297    | 2.0143  | 1.7625    | 1.9819  | 1.7383    | 1.9774  | 1.4916    | 1.8276  | 1.0757    |

|   |   | 2-Jun   |           | 3-Jun   |           | 4-Jun   |           | 5-Jun   |           | 6-Jun   |           | 7-Jun   |           | 8-Jun   |           | 9-Jun   |           |
|---|---|---------|-----------|---------|-----------|---------|-----------|---------|-----------|---------|-----------|---------|-----------|---------|-----------|---------|-----------|
|   |   | Natural | Optimized |
| S | D | 0.9555  | 0.4482    | 0.9787  | 0.4930    | 1.0612  | 0.6661    | 1.2984  | 0.9080    | 1.4285  | 0.9180    | 1.4399  | 0.9956    | 1.4047  | 0.8284    | 1.3422  | 0.9115    |
|   | N | 1.1120  | 0.7188    | 1.0930  | 0.5800    | 1.0865  | 0.6625    | 1.1291  | 0.6970    | 1.2104  | 0.7921    | 1.2379  | 0.8612    | 1.2420  | 0.7744    | 1.2432  | 0.8362    |
|   | W | 1.7801  | 0.9581    | 1.7450  | 1.2042    | 1.6959  | 1.0400    | 1.6270  | 0.9348    | 1.5875  | 1.0028    | 1.5811  | 0.8496    | 1.5838  | 0.9508    | 1.5461  | 1.0199    |

|   |   | 10-Jun  |           | 11-Jun  |           | 12-Jun  |           | 13-Jun  |           | 14-Jun  |           | 15-Jun  |           | 16-Jun  |           | 17-Jun  |           |
|---|---|---------|-----------|---------|-----------|---------|-----------|---------|-----------|---------|-----------|---------|-----------|---------|-----------|---------|-----------|
|   |   | Natural | Optimized |
| S | D | 1.2704  | 0.8245    | 1.2014  | 0.7575    | 1.1300  | 0.7056    | 1.0632  | 0.6213    | 1.0049  | 0.5896    | 0.9563  | 0.4287    | 0.9165  | 0.4699    | 0.8843  | 0.4523    |
|   | N | 1.2147  | 0.7853    | 1.1928  | 0.7448    | 1.1969  | 0.6993    | 1.1990  | 0.7652    | 1.2218  | 0.6866    | 1.1947  | 0.6385    | 1.1432  | 0.7190    | 1.0875  | 0.5902    |
|   | W | 1.4841  | 0.9443    | 1.3992  | 0.8695    | 1.3086  | 0.6762    | 1.2228  | 0.6698    | 1.1477  | 0.4675    | 1.0828  | 0.5294    | 1.0275  | 0.5824    | 0.9810  | 0.4136    |

|   |   | 18-Jun  |           | 19-Jun  |           | 20-Jun  |           | 21-Jun  |           | 22-Jun  |           | 23-Jun  |           | 24-Jun  |           | 25-Jun  |           |
|---|---|---------|-----------|---------|-----------|---------|-----------|---------|-----------|---------|-----------|---------|-----------|---------|-----------|---------|-----------|
|   |   | Natural | Optimized |
| S | D | 0.8579  | 0.4289    | 0.8360  | 0.4094    | 0.8178  | 0.4157    | 0.8024  | 0.3883    | 0.8103  | 0.4050    | 0.8608  | 0.3507    | 0.8635  | 0.3801    | 0.8425  | 0.3723    |
|   | N | 1.0365  | 0.6455    | 0.9922  | 0.5591    | 0.9549  | 0.5065    | 0.9243  | 0.5373    | 0.8984  | 0.4958    | 0.8767  | 0.4766    | 0.8582  | 0.3899    | 0.8421  | 0.4368    |
|   | W | 0.9428  | 0.4066    | 0.9114  | 0.4112    | 0.8853  | 0.3103    | 0.8874  | 0.3778    | 0.9739  | 0.3843    | 1.0614  | 0.5242    | 1.1024  | 0.5067    | 1.0993  | 0.4862    |

|   |   | 26-Jun  |           | 27-Jun  |           | 28-Jun  |           | 29-Jun  |           | 30-Jun  |           | 1-Jul   |           | 2-Jul   |           | 3-Jul   |           |
|---|---|---------|-----------|---------|-----------|---------|-----------|---------|-----------|---------|-----------|---------|-----------|---------|-----------|---------|-----------|
|   |   | Natural | Optimized |
| S | D | 0.8174  | 0.3703    | 0.7939  | 0.3482    | 0.7728  | 0.3700    | 0.7553  | 0.3416    | 0.7397  | 0.2812    | 0.7158  | 0.2555    | 0.7193  | 0.3106    | 0.7443  | 0.3461    |
|   | N | 0.8277  | 0.4214    | 0.8147  | 0.3807    | 0.8021  | 0.3735    | 0.7903  | 0.3296    | 0.7796  | 0.3513    | 0.7621  | 0.3492    | 0.7516  | 0.3064    | 0.7415  | 0.3598    |
|   | W | 1.0706  | 0.4999    | 1.0298  | 0.5324    | 0.9846  | 0.4319    | 0.9393  | 0.4440    | 0.8972  | 0.3854    | 0.8656  | 0.2991    | 0.8443  | 0.3392    | 0.8185  | 0.3230    |

|   |   | 4-Jul   |           | 5-Jul   |           | 6-Jul   |           | 7-Jul   |           | 8-Jul   |           | 9-Jul   |           | 10-Jul  |           | 11-Jul  |           |
|---|---|---------|-----------|---------|-----------|---------|-----------|---------|-----------|---------|-----------|---------|-----------|---------|-----------|---------|-----------|
|   |   | Natural | Optimized |
| S | D | 0.7477  | 0.2660    | 0.7377  | 0.3356    | 0.7239  | 0.3544    | 0.7050  | 0.3391    | 0.6864  | 0.2267    | 0.6692  | 0.2556    | 0.6544  | 0.2428    | 0.6414  | 0.2268    |
|   | N | 0.7506  | 0.3579    | 0.8323  | 0.3984    | 0.8597  | 0.4385    | 0.8468  | 0.3958    | 0.8195  | 0.4312    | 0.7887  | 0.4082    | 0.7589  | 0.3187    | 0.7318  | 0.2960    |
|   | W | 0.7924  | 0.3265    | 0.7772  | 0.2655    | 0.8027  | 0.3226    | 0.8062  | 0.2325    | 0.7901  | 0.2712    | 0.7672  | 0.2442    | 0.7525  | 0.1893    | 0.7312  | 0.2401    |

|   |   | 12-Jul  |           | 13-Jul  |           | 14-Jul  |           | 15-Jul  |           | 16-Jul  |           | 17-Jul  |           | 18-Jul  |           | 19-Jul  |           |
|---|---|---------|-----------|---------|-----------|---------|-----------|---------|-----------|---------|-----------|---------|-----------|---------|-----------|---------|-----------|
|   |   | Natural | Optimized |
| S | D | 0.6339  | 0.2468    | 0.6275  | 0.2267    | 0.6178  | 0.2049    | 0.6237  | 0.2181    | 0.6357  | 0.1653    | 0.6269  | 0.2025    | 0.6142  | 0.2154    | 0.5990  | 0.2021    |
|   | N | 0.7082  | 0.3159    | 0.6880  | 0.2837    | 0.6702  | 0.2785    | 0.6546  | 0.2392    | 0.6411  | 0.2710    | 0.6282  | 0.1745    | 0.6167  | 0.2258    | 0.6059  | 0.2056    |
|   | W | 0.7076  | 0.2255    | 0.6861  | 0.1705    | 0.6676  | 0.1960    | 0.6513  | 0.2149    | 0.6371  | 0.2076    | 0.6246  | 0.1585    | 0.6131  | 0.1822    | 0.6068  | 0.1500    |
|   |   |         |           |         |           |         |           |         |           |         |           |         |           |         |           |         |           |
|   |   | 20-Jul  |           | 21-Jul  |           | 22-Jul  |           | 23-Jul  |           | 24-Jul  |           | 25-Jul  |           | 26-Jul  |           | 27-Jul  |           |
|   |   | Natural | Optimized |
| S | D | 0.5852  | 0.2022    | 0.5722  | 0.1609    | 0.5598  | 0.1164    | 0.5487  | 0.1471    | 0.5387  | 0.1347    | 0.5293  | 0.1361    | 0.5204  | 0.1325    | 0.5121  | 0.1245    |
|   | N | 0.5956  | 0.1855    | 0.5857  | 0.1968    | 0.5762  | 0.2102    | 0.5669  | 0.2053    | 0.5577  | 0.1422    | 0.5488  | 0.1520    | 0.5396  | 0.1844    | 0.5310  | 0.1392    |
|   | W | 0.5974  | 0.1274    | 0.5863  | 0.1153    | 0.5757  | 0.1071    | 0.5660  | 0.1148    | 0.5564  | 0.1047    | 0.5473  | 0.1109    | 0.5384  | 0.0980    | 0.5299  | 0.0936    |
|   |   |         |           |         |           |         |           |         |           |         |           |         |           |         |           |         |           |
|   |   | 28-Jul  |           | 29-Jul  |           | 30-Jul  |           | 31-Jul  |           | 1-Aug   |           | 2-Aug   |           | 3-Aug   |           | 4-Aug   |           |
|   |   | Natural | Optimized |
| S | D | 0.5039  | 0.1198    | 0.4962  | 0.1071    | 0.4884  | 0.1001    | 0.4841  | 0.1177    | 0.4821  | 0.1118    | 0.4746  | 0.0827    | 0.4669  | 0.0876    | 0.4596  | 0.0821    |
|   | N | 0.5229  | 0.1359    | 0.5143  | 0.1404    | 0.5057  | 0.1569    | 0.4974  | 0.0949    | 0.5005  | 0.1526    | 1.0747  | 0.6872    | 1.8866  | 1.4559    | 0.8109  | 0.3952    |
|   | W | 0.5213  | 0.1101    | 0.5127  | 0.0856    | 0.5046  | 0.0691    | 0.4963  | 0.0663    | 0.4927  | 0.0743    | 0.4849  | 0.0657    | 0.4768  | 0.0696    | 0.4686  | 0.0523    |
|   |   |         |           |         |           |         |           |         |           |         |           |         |           |         |           |         |           |
|   |   | 5-Aug   |           | 6-Aug   |           | 7-Aug   |           | 8-Aug   |           | 9-Aug   |           | 10-Aug  |           | 11-Aug  |           | 12-Aug  |           |
|   |   | Natural | Optimized |
| S | D | 0.4525  | 0.0719    | 0.4451  | 0.0968    | 0.4379  | 0.0773    | 0.4309  | 0.0617    | 0.4240  | 0.0492    | 0.4169  | 0.0476    | 0.4102  | 0.0504    | 0.4030  | 0.0443    |
|   | N | 0.5935  | 0.2016    | 0.5310  | 0.1595    | 0.5087  | 0.1230    | 0.4895  | 0.1053    | 0.4730  | 0.0958    | 0.4587  | 0.1002    | 0.4466  | 0.1017    | 0.4358  | 0.0875    |
|   | W | 0.4608  | 0.0577    | 0.4533  | 0.0377    | 0.4673  | 0.0447    | 0.8703  | 0.3164    | 0.5633  | 0.1019    | 0.5215  | 0.0966    | 0.5029  | 0.0837    | 0.4826  | 0.0570    |
|   |   |         |           |         |           |         |           |         |           |         |           |         |           |         |           |         |           |
|   |   | 13-Aug  |           | 14-Aug  |           | 15-Aug  |           | 16-Aug  |           | 17-Aug  |           | 18-Aug  |           | 19-Aug  |           | 20-Aug  |           |
|   |   | Natural | Optimized |
| S | D | 0.3963  | 0.0442    | 0.3898  | 0.0422    | 0.3829  | 0.0291    | 0.3767  | 0.0227    | 0.3699  | 0.0288    | 0.3637  | 0.0189    | 0.3573  | 0.0192    | 0.3510  | 0.0122    |
|   | N | 0.4261  | 0.0886    | 0.4171  | 0.0744    | 0.4089  | 0.0637    | 0.4012  | 0.0623    | 0.3941  | 0.0617    | 0.3869  | 0.0458    | 0.3800  | 0.0439    | 0.3733  | 0.0445    |
|   | W | 0.4612  | 0.0443    | 0.4426  | 0.0350    | 0.4281  | 0.0201    | 0.4351  | 0.0254    | 0.4308  | 0.0256    | 0.4177  | 0.0162    | 0.4041  | 0.0064    | 0.3921  | 0.0026    |
|   |   |         |           |         |           |         |           |         |           |         |           |         |           |         |           |         |           |
|   |   | 21-Aug  |           | 22-Aug  |           | 23-Aug  |           | 24-Aug  |           | 25-Aug  |           | 26-Aug  |           | 27-Aug  |           | 28-Aug  |           |
|   |   | Natural | Optimized |
| S | D | 0.3446  | 0.0048    | 0.3386  | 0.0188    | 0.3327  | 0.0033    | 0.3267  | 0.0074    | 0.3305  | 0.0021    | 1.3283  | 0.8197    | 1.8750  | 1.2829    | 1.1745  | 0.7728    |
|   | N | 0.3671  | 0.0394    | 0.3604  | 0.0338    | 0.3544  | 0.0311    | 0.3483  | 0.0283    | 0.3520  | 0.0283    | 0.4023  | 0.0633    | 0.4830  | 0.1044    | 0.8281  | 0.4270    |
|   | W | 0.3962  | 0.0079    | 0.4686  | 0.0522    | 0.5601  | 0.1168    | 0.6569  | 0.1639    | 1.9264  | 1.2972    | 2.7861  | 2.1351    | 1.4190  | 0.8232    | 1.1578  | 0.6941    |
|   |   |         |           |         |           |         |           |         |           |         |           |         |           |         |           |         |           |
|   |   | 29-Aug  |           | 30-Aug  |           | 31-Aug  |           | 1-Sep   |           | 2-Sep   |           | 3-Sep   |           | 4-Sep   |           | 5-Sep   |           |
|   |   | Natural | Optimized |
| S | D | 0.8035  | 0.3542    | 0.7064  | 0.2792    | 0.6513  | 0.2786    | 0.5623  | 0.4056    | 0.5126  | 0.3813    | 0.4684  | 0.3703    | 0.4298  | 0.3128    | 0.3984  | 0.3016    |
|   | N | 0.6611  | 0.2444    | 0.6193  | 0.2600    | 0.5837  | 0.1835    | 0.5123  | 0.3934    | 0.4761  | 0.3759    | 0.4415  | 0.3206    | 0.4099  | 0.3188    | 0.3834  | 0.2744    |
|   | W | 1.0368  | 0.5278    | 1.0433  | 0.5791    | 1.0577  | 0.4819    | 0.9793  | 0.6001    | 0.9582  | 0.7917    | 0.9084  | 0.6857    | 0.8430  | 0.5813    | 0.7713  | 0.5568    |
|   |   |         |           |         |           |         |           |         |           |         |           |         |           |         |           |         |           |
|   |   | 6-Sep   |           | 7-Sep   |           | 8-Sep   |           | 9-Sep   |           | 10-Sep  |           | 11-Sep  |           | 12-Sep  |           | 13-Sep  |           |
|   |   | Natural | Optimized |
| S | D | 0.3726  | 0.3018    | 0.3519  | 0.2390    | 0.3501  | 0.2547    | 0.3730  | 0.2013    | 0.3755  | 0.3162    | 0.3636  | 0.2285    | 0.3482  | 0.1891    | 0.3330  | 0.2122    |
|   | N | 0.3611  | 0.2517    | 0.3425  | 0.2143    | 0.3423  | 0.2308    | 0.3656  | 0.2375    | 0.3687  | 0.2602    | 0.3572  | 0.2524    | 0.3413  | 0.2577    | 0.3258  | 0.2151    |
|   | W | 0.6992  | 0.4906    | 0.6311  | 0.4725    | 0.5685  | 0.4267    | 0.5134  | 0.3854    | 0.4655  | 0.2878    | 0.4255  | 0.2370    | 0.3923  | 0.2569    | 0.3649  | 0.2763    |



|   |   | 14-Sep  |           | 15-Sep  |           | 16-Sep  |           | 17-Sep  |           | 18-Sep  |           | 19-Sep  |           | 20-Sep  |           | 21-Sep  |           |
|---|---|---------|-----------|---------|-----------|---------|-----------|---------|-----------|---------|-----------|---------|-----------|---------|-----------|---------|-----------|
|   |   | Natural | Optimized |
| S | D | 0.3192  | 0.2283    | 0.3077  | 0.2183    | 0.2979  | 0.2184    | 0.2897  | 0.1963    | 0.2829  | 0.2205    | 0.2773  | 0.1495    | 0.2722  | 0.1878    | 0.2677  | 0.1491    |
|   | N | 0.3337  | 0.1839    | 0.3461  | 0.2577    | 0.3335  | 0.2167    | 0.3166  | 0.2093    | 0.3017  | 0.1890    | 0.2902  | 0.2200    | 0.2805  | 0.1943    | 0.2724  | 0.1854    |
|   | W | 0.3433  | 0.2199    | 0.3256  | 0.2298    | 0.3114  | 0.2064    | 0.2997  | 0.1869    | 0.2907  | 0.2107    | 0.2826  | 0.2088    | 0.2755  | 0.1796    | 0.2695  | 0.1567    |
|   |   |         |           |         |           |         |           |         |           |         |           |         |           |         |           |         |           |
|   |   | 22-Sep  |           | 23-Sep  |           | 24-Sep  |           | 25-Sep  |           | 26-Sep  |           | 27-Sep  |           | 28-Sep  |           | 29-Sep  |           |
|   |   | Natural | Optimized |
| S | D | 0.2635  | 0.1821    | 0.2597  | 0.1924    | 0.2635  | 0.1674    | 0.2789  | 0.1930    | 0.3035  | 0.2408    | 1.6063  | 1.4372    | 2.1695  | 2.0922    | 0.7746  | 0.5536    |
|   | N | 0.2661  | 0.2090    | 0.2650  | 0.2089    | 0.2964  | 0.2217    | 0.3101  | 0.2193    | 0.3067  | 0.2252    | 0.2969  | 0.1482    | 0.2842  | 0.2170    | 0.2721  | 0.2093    |
|   | W | 0.2651  | 0.1724    | 0.2669  | 0.1764    | 0.3000  | 0.2015    | 0.3436  | 0.1974    | 0.3428  | 0.2487    | 0.5081  | 0.4433    | 1.1800  | 0.9454    | 0.4961  | 0.3734    |
|   |   |         |           |         |           |         |           |         |           |         |           |         |           |         |           |         |           |
|   |   | 30-Sep  |           | 1-Oct   |           | 2-Oct   |           | 3-Oct   |           | 4-Oct   |           | 5-Oct   |           | 6-Oct   |           | 7-Oct   |           |
|   |   | Natural | Optimized |
| S | D | 0.4846  | 0.2897    | 0.3971  | 0.0445    | 0.4377  | 0.0652    | 0.5165  | 0.1450    | 0.5448  | 0.1376    | 0.5348  | 0.1460    | 0.5068  | 0.1283    | 0.4716  | 0.0698    |
|   | N | 0.2646  | 0.1610    | 0.2720  | 0.0001    | 0.2721  | 0.0004    | 0.2644  | 0.0007    | 0.2686  | 0.0015    | 0.3026  | 0.0003    | 0.3971  | 0.0623    | 0.5806  | 0.1377    |
|   | W | 0.3535  | 0.2208    | 0.3579  | 0.0002    | 0.3793  | 0.0000    | 0.4228  | 0.0215    | 0.5874  | 0.0956    | 2.3234  | 1.6761    | 3.7977  | 3.2612    | 1.9531  | 1.3115    |
|   |   |         |           |         |           |         |           |         |           |         |           |         |           |         |           |         |           |
|   |   | 8-Oct   |           | 9-Oct   |           | 10-Oct  |           | 11-Oct  |           | 12-Oct  |           | 13-Oct  |           | 14-Oct  |           | 15-Oct  |           |
|   |   | Natural | Optimized |
| S | D | 0.4348  | 0.0551    | 0.4047  | 0.0471    | 0.3942  | 0.0443    | 0.3792  | 0.0276    | 0.3721  | 0.0199    | 0.3764  | 0.0325    | 0.4229  | 0.0549    | 0.4411  | 0.0757    |
|   | N | 1.5434  | 0.9987    | 1.5831  | 1.0944    | 1.1376  | 0.6743    | 0.9186  | 0.4433    | 0.9115  | 0.4254    | 0.9280  | 0.5038    | 0.9455  | 0.5089    | 0.9761  | 0.5915    |
|   | W | 1.7685  | 0.9971    | 1.8446  | 1.0608    | 2.9661  | 2.2481    | 3.1294  | 2.5836    | 2.0610  | 1.3319    | 1.7944  | 1.0706    | 1.6950  | 1.0175    | 1.6039  | 0.9959    |
|   |   |         |           |         |           |         |           |         |           |         |           |         |           |         |           |         |           |
|   |   | 16-Oct  |           | 17-Oct  |           | 18-Oct  |           | 19-Oct  |           | 20-Oct  |           | 21-Oct  |           | 22-Oct  |           | 23-Oct  |           |
|   |   | Natural | Optimized |
| S | D | 0.4889  | 0.0976    | 0.5042  | 0.0941    | 0.5006  | 0.0945    | 0.4849  | 0.0958    | 0.4996  | 0.1159    | 0.5962  | 0.2042    | 0.6710  | 0.2515    | 0.7016  | 0.3042    |
|   | N | 0.9814  | 0.4913    | 0.9495  | 0.5063    | 0.9099  | 0.4447    | 0.9190  | 0.5148    | 0.9693  | 0.4809    | 0.9617  | 0.5407    | 0.9171  | 0.4181    | 0.8436  | 0.3889    |
|   | W | 1.5068  | 0.9746    | 1.4180  | 0.7353    | 1.3333  | 0.7462    | 1.2319  | 0.5569    | 1.1252  | 0.6041    | 1.0396  | 0.4563    | 1.0217  | 0.5324    | 2.0316  | 1.1784    |
|   |   |         |           |         |           |         |           |         |           |         |           |         |           |         |           |         |           |
|   |   | 24-Oct  |           | 25-Oct  |           | 26-Oct  |           | 27-Oct  |           | 28-Oct  |           | 29-Oct  |           | 30-Oct  |           | 31-Oct  |           |
|   |   | Natural | Optimized |
| S | D | 0.7195  | 0.2384    | 0.7298  | 0.3105    | 0.6920  | 0.2294    | 0.6332  | 0.2035    | 0.5827  | 0.1917    | 0.5594  | 0.1618    | 0.5392  | 0.7140    | 0.5666  | 0.7305    |
|   | N | 0.7588  | 0.3015    | 0.6751  | 0.2141    | 0.5983  | 0.1945    | 0.5308  | 0.1342    | 0.4727  | 0.0957    | 0.4275  | 0.0792    | 0.3961  | 0.0643    | 0.3669  | 0.0365    |
|   | W | 2.2700  | 1.7810    | 1.4340  | 0.8435    | 1.4447  | 0.8404    | 1.4794  | 0.9398    | 1.5303  | 1.0255    | 1.5189  | 0.8688    | 1.5096  | 0.8577    | 1.7039  | 0.9911    |
|   |   |         |           |         |           |         |           |         |           |         |           |         |           |         |           |         |           |
|   |   | 1-Nov   |           | 2-Nov   |           | 3-Nov   |           | 4-Nov   |           | 5-Nov   |           | 6-Nov   |           | 7-Nov   |           | 8-Nov   |           |
|   |   | Natural | Optimized |
| S | D | 0.5010  | 0.6200    | 0.4858  | 0.6035    | 0.4802  | 0.5781    | 0.5042  | 0.6371    | 0.7672  | 1.0949    | 1.8355  | 3.2900    | 1.1795  | 1.7985    | 1.0716  | 1.6856    |
|   | N | 0.3504  | 0.0226    | 0.3319  | 0.0128    | 0.3377  | 0.0144    | 0.3487  | 0.0251    | 0.4045  | 0.0592    | 0.5173  | 0.1549    | 0.5954  | 0.2154    | 0.5867  | 0.1563    |
|   | W | 1.4049  | 0.8082    | 1.3212  | 0.7780    | 1.2751  | 0.6222    | 1.2341  | 0.6754    | 1.1775  | 0.6271    | 1.1001  | 0.5229    | 1.0175  | 0.4697    | 0.9549  | 0.4530    |
|   |   |         |           |         |           |         |           |         |           |         |           |         |           |         |           |         |           |
|   |   | 9-Nov   |           | 10-Nov  |           | 11-Nov  |           | 12-Nov  |           | 13-Nov  |           | 14-Nov  |           | 15-Nov  |           | 16-Nov  |           |
|   |   | Natural | Optimized |
| S | D | 1.0117  | 1.6153    | 0.9776  | 1.4834    | 0.9455  | 1.3862    | 0.9004  | 1.3880    | 0.8631  | 1.3123    | 0.9089  | 1.3645    | 0.9624  | 1.4673    | 0.9827  | 1.4896    |
|   | N | 0.5598  | 0.2125    | 0.6131  | 0.2277    | 2.5040  | 2.0612    | 3.5435  | 3.1766    | 1.7641  | 1.3511    | 1.2925  | 0.8192    | 1.4162  | 0.9785    | 1.5739  | 0.9973    |
|   | W | 0.8923  | 0.3443    | 0.8829  | 0.3579    | 0.8986  | 0.3833    | 1.0812  | 0.5613    | 1.5186  | 0.8635    | 1.3422  | 0.8434    | 1.5399  | 0.7805    | 1.7742  | 1.0544    |

|   |   | 17-Nov  |           | 18-Nov  |           | 19-Nov  |           | 20-Nov  |           | 21-Nov  |           | 22-Nov  |           | 23-Nov  |           | 24-Nov  |           |
|---|---|---------|-----------|---------|-----------|---------|-----------|---------|-----------|---------|-----------|---------|-----------|---------|-----------|---------|-----------|
|   |   | Natural | Optimized |
| S | D | 1.0544  | 1.5747    | 1.1080  | 1.6839    | 1.1777  | 1.9183    | 1.2991  | 2.1219    | 1.3658  | 2.2453    | 1.3505  | 2.2080    | 1.3161  | 2.2512    | 1.2843  | 2.0735    |
|   | N | 1.7424  | 1.1776    | 1.9090  | 1.4432    | 3.1199  | 2.7685    | 7.9024  | 7.5619    | 8.8303  | 8.5053    | 5.0315  | 4.6232    | 2.6426  | 2.1757    | 2.2236  | 1.7224    |
|   | W | 1.9993  | 1.3698    | 2.2624  | 1.4535    | 2.4597  | 1.8570    | 2.5680  | 2.0320    | 2.5981  | 2.0194    | 2.7191  | 2.1158    | 4.3265  | 3.8109    | 6.9175  | 6.4368    |

|   |   | 25-Nov  |           | 26-Nov  |           | 27-Nov  |           | 28-Nov  |           | 29-Nov  |           | 30-Nov  |           | 1-Dec   |           | 2-Dec   |           |
|---|---|---------|-----------|---------|-----------|---------|-----------|---------|-----------|---------|-----------|---------|-----------|---------|-----------|---------|-----------|
|   |   | Natural | Optimized |
| S | D | 1.2465  | 2.0273    | 1.2487  | 2.1048    | 1.8713  | 3.3058    | 2.3864  | 4.2503    | 1.8804  | 3.3413    | 2.0066  | 3.5843    | 3.1376  | 5.7084    | 4.5510  | 7.3650    |
|   | N | 2.1925  | 1.7451    | 2.2642  | 1.8979    | 2.3868  | 1.8331    | 2.3918  | 1.9936    | 3.0699  | 2.4276    | 4.2200  | 3.8812    | 3.3481  | 2.3358    | 3.5534  | 2.1921    |
|   | W | 7.6423  | 7.1100    | 6.9757  | 6.5327    | 6.0843  | 5.5846    | 5.0748  | 4.3856    | 3.3812  | 2.8116    | 4.2726  | 3.7749    | 4.9556  | 4.9014    | 3.5778  | 3.4179    |

|   |   | 3-Dec   |           | 4-Dec   |           | 5-Dec   |           | 6-Dec   |           | 7-Dec   |           | 8-Dec   |           | 9-Dec   |           | 10-Dec  |           |
|---|---|---------|-----------|---------|-----------|---------|-----------|---------|-----------|---------|-----------|---------|-----------|---------|-----------|---------|-----------|
|   |   | Natural | Optimized |
| S | D | 4.4096  | 6.0189    | 4.4953  | 6.2822    | 4.4979  | 6.3071    | 4.5202  | 6.9455    | 3.8592  | 6.1173    | 2.5728  | 5.0002    | 2.2521  | 4.3433    | 4.4108  | 8.6605    |
|   | N | 4.2340  | 2.5455    | 4.5928  | 2.8806    | 4.7306  | 2.9894    | 4.8364  | 3.1349    | 4.2284  | 2.7836    | 2.9655  | 2.1691    | 2.6561  | 2.5180    | 2.6057  | 2.3816    |
|   | W | 2.9753  | 2.6393    | 2.7657  | 2.5760    | 5.8692  | 5.7241    | 6.3517  | 6.1400    | 5.4423  | 5.2090    | 5.5900  | 5.5053    | 3.4395  | 3.2209    | 2.7279  | 1.9984    |

|   |   | 11-Dec  |           | 12-Dec  |           | 13-Dec  |           | 14-Dec  |           | 15-Dec  |           | 16-Dec  |           | 17-Dec  |           | 18-Dec  |           |
|---|---|---------|-----------|---------|-----------|---------|-----------|---------|-----------|---------|-----------|---------|-----------|---------|-----------|---------|-----------|
|   |   | Natural | Optimized |
| S | D | 5.1012  | 10.1340   | 2.9426  | 5.7675    | 2.7115  | 5.2729    | 2.4732  | 4.8381    | 2.4429  | 4.7426    | 2.3722  | 4.5852    | 2.2684  | 4.3611    | 2.0961  | 3.9632    |
|   | N | 2.5689  | 2.5145    | 2.4932  | 2.3309    | 2.3550  | 2.1929    | 2.2351  | 1.9389    | 2.1910  | 2.1141    | 2.3155  | 2.0749    | 2.4488  | 2.3727    | 2.1038  | 1.9965    |
|   | W | 2.7078  | 2.4504    | 2.8734  | 2.3941    | 3.8099  | 3.4698    | 4.7146  | 4.4621    | 3.5100  | 3.2225    | 3.2944  | 3.0038    | 3.9007  | 3.5878    | 6.8284  | 6.6278    |

|   |   | 19-Dec  |           | 20-Dec  |           | 21-Dec  |           | 22-Dec  |           | 23-Dec  |           | 24-Dec  |           | 25-Dec  |           | 26-Dec  |           |
|---|---|---------|-----------|---------|-----------|---------|-----------|---------|-----------|---------|-----------|---------|-----------|---------|-----------|---------|-----------|
|   |   | Natural | Optimized |
| S | D | 1.9058  | 3.6603    | 1.7288  | 3.2229    | 1.5924  | 2.9595    | 1.5626  | 3.0176    | 1.5185  | 2.7345    | 1.4438  | 2.7891    | 3.8113  | 7.3707    | 5.2902  | 10.4833   |
|   | N | 2.0589  | 1.9343    | 2.1124  | 2.0093    | 2.1683  | 1.9860    | 2.2501  | 2.0714    | 2.3328  | 2.0686    | 2.3309  | 2.2156    | 2.2330  | 1.9799    | 2.1550  | 1.9894    |
|   | W | 6.8255  | 6.6454    | 4.0592  | 3.9888    | 3.6380  | 3.4711    | 6.1654  | 6.0966    | 8.2585  | 7.9432    | 6.0289  | 5.9600    | 4.3602  | 4.0142    | 3.9467  | 3.8059    |

|   |   | 27-Dec  |           | 28-Dec  |           | 29-Dec  |           | 30-Dec  |           | 31-Dec  |           |
|---|---|---------|-----------|---------|-----------|---------|-----------|---------|-----------|---------|-----------|
|   |   | Natural | Optimized |
| S | D | 3.1512  | 6.2538    | 2.0577  | 3.9408    | 1.9317  | 3.5916    | 1.9722  | 3.7903    | 2.0461  | 4.0311    |
|   | N | 2.2859  | 2.1686    | 2.4646  | 2.1413    | 2.5584  | 2.4971    | 2.5864  | 2.5366    | 2.6374  | 2.5547    |
|   | W | 3.7929  | 3.6296    | 3.9079  | 3.7087    | 3.9912  | 3.7950    | 3.9782  | 3.7834    | 3.8760  | 3.6872    |

**Table S10.** Comparison of average natural discharge values under different scenarios and the optimized discharge thresholds. **Results for DP2** for sub-normal (dry), normal and above-normal (wet) hydrological conditions.

|   |   | 1-Jan   |           | 2-Jan   |           | 3-Jan   |           | 4-Jan   |           | 5-Jan   |           | 6-Jan   |           | 7-Jan   |           | 8-Jan   |           |
|---|---|---------|-----------|---------|-----------|---------|-----------|---------|-----------|---------|-----------|---------|-----------|---------|-----------|---------|-----------|
|   |   | Natural | Optimized |
| S | D | 5.9146  | 5.1633    | 5.8658  | 5.8016    | 5.8241  | 5.3982    | 8.0919  | 7.9802    | 11.6450 | 9.9287    | 11.7683 | 8.1527    | 10.0950 | 6.3245    | 8.4880  | 4.9904    |
|   | N | 11.1707 | 6.7491    | 14.4555 | 9.0357    | 15.2655 | 9.3264    | 11.9407 | 5.0480    | 10.3348 | 3.4738    | 9.7044  | 2.8087    | 9.3389  | 4.6792    | 8.9967  | 6.3579    |
|   | W | 7.1581  | 6.7271    | 6.8927  | 6.0190    | 6.5863  | 6.0478    | 6.6051  | 6.3284    | 6.6644  | 6.3814    | 10.1940 | 9.0921    | 12.3759 | 12.1318   | 9.3709  | 8.8301    |

|   |   | 9-Jan   |           | 10-Jan  |           | 11-Jan  |           | 12-Jan  |           | 13-Jan  |           | 14-Jan  |           | 15-Jan  |           | 16-Jan  |           |
|---|---|---------|-----------|---------|-----------|---------|-----------|---------|-----------|---------|-----------|---------|-----------|---------|-----------|---------|-----------|
|   |   | Natural | Optimized |
| S | D | 8.9824  | 7.8267    | 8.2789  | 7.9379    | 11.0679 | 10.8602   | 12.3161 | 12.0747   | 9.0844  | 8.9502    | 8.1350  | 8.0069    | 7.6004  | 7.3940    | 7.1883  | 6.9447    |
|   | N | 8.7574  | 7.8383    | 8.7861  | 8.4910    | 8.9725  | 8.8030    | 9.1509  | 8.8580    | 9.1956  | 8.3604    | 10.6037 | 10.2016   | 11.7701 | 11.6364   | 9.8958  | 9.6746    |
|   | W | 7.5974  | 6.6675    | 6.7264  | 5.7368    | 8.7881  | 8.4770    | 10.8640 | 10.3762   | 11.3025 | 10.3580   | 8.8636  | 8.4528    | 14.3422 | 13.8453   | 17.2921 | 16.8148   |

|   |   | 17-Jan  |           | 18-Jan  |           | 19-Jan  |           | 20-Jan  |           | 21-Jan  |           | 22-Jan  |           | 23-Jan  |           | 24-Jan  |           |
|---|---|---------|-----------|---------|-----------|---------|-----------|---------|-----------|---------|-----------|---------|-----------|---------|-----------|---------|-----------|
|   |   | Natural | Optimized |
| S | D | 6.9008  | 6.7387    | 6.6818  | 6.2228    | 6.3965  | 6.2099    | 6.0787  | 5.7220    | 5.7248  | 5.2345    | 5.3054  | 5.0008    | 5.0197  | 4.5028    | 4.9104  | 4.7042    |
|   | N | 10.5951 | 10.2670   | 9.1007  | 8.3591    | 8.9189  | 8.2136    | 8.8316  | 7.7451    | 8.5485  | 7.6466    | 8.2429  | 7.3491    | 8.1096  | 7.6890    | 8.0001  | 7.8154    |
|   | W | 10.1931 | 9.3158    | 8.0715  | 7.2717    | 7.5939  | 7.0546    | 10.4792 | 9.9329    | 11.9981 | 11.6958   | 8.9785  | 8.4436    | 8.1560  | 7.4967    | 8.0277  | 7.2152    |

|   |   | 25-Jan  |           | 26-Jan  |           | 27-Jan  |           | 28-Jan  |           | 29-Jan  |           | 30-Jan  |           | 31-Jan  |           | 1-Feb   |           |
|---|---|---------|-----------|---------|-----------|---------|-----------|---------|-----------|---------|-----------|---------|-----------|---------|-----------|---------|-----------|
|   |   | Natural | Optimized |
| S | D | 4.6973  | 4.1178    | 4.5876  | 4.3929    | 4.7392  | 4.0213    | 7.3309  | 7.1011    | 10.1129 | 9.9979    | 10.8676 | 10.6711   | 11.4307 | 10.8745   | 8.4899  | 8.1633    |
|   | N | 7.8016  | 7.5366    | 7.6508  | 7.1563    | 7.5163  | 7.3217    | 8.1773  | 7.9765    | 9.5691  | 9.2567    | 7.9927  | 7.5399    | 7.4508  | 7.1080    | 6.8833  | 6.2222    |
|   | W | 8.1609  | 7.3929    | 8.7973  | 8.2303    | 9.9886  | 9.5668    | 9.1053  | 8.7601    | 9.2133  | 8.6721    | 17.5653 | 17.2366   | 22.6549 | 22.4590   | 20.9461 | 20.3483   |

|   |   | 2-Feb   |           | 3-Feb   |           | 4-Feb   |           | 5-Feb   |           | 6-Feb   |           | 7-Feb   |           | 8-Feb   |           | 9-Feb   |           |
|---|---|---------|-----------|---------|-----------|---------|-----------|---------|-----------|---------|-----------|---------|-----------|---------|-----------|---------|-----------|
|   |   | Natural | Optimized |
| S | D | 6.8656  | 6.7282    | 6.8099  | 6.6133    | 9.2807  | 9.0205    | 9.8594  | 9.6123    | 7.6835  | 7.5104    | 5.4631  | 4.9135    | 4.8250  | 4.1981    | 4.6088  | 4.0372    |
|   | N | 6.5604  | 5.8804    | 6.2866  | 5.3730    | 6.1985  | 5.5013    | 6.0779  | 5.6686    | 6.0441  | 5.4715    | 6.1002  | 5.8084    | 6.2115  | 5.8520    | 6.2336  | 5.7592    |
|   | W | 19.2496 | 18.4912   | 13.5318 | 13.2899   | 8.7213  | 8.0281    | 16.1002 | 15.8882   | 17.5735 | 17.2156   | 12.3853 | 11.8613   | 14.9532 | 14.7334   | 17.7952 | 17.4511   |

|   |   | 10-Feb  |           | 11-Feb  |           | 12-Feb  |           | 13-Feb  |           | 14-Feb  |           | 15-Feb  |           | 16-Feb  |           | 17-Feb  |           |
|---|---|---------|-----------|---------|-----------|---------|-----------|---------|-----------|---------|-----------|---------|-----------|---------|-----------|---------|-----------|
|   |   | Natural | Optimized |
| S | D | 4.5035  | 4.1415    | 4.3850  | 4.2995    | 4.2053  | 3.6044    | 4.0300  | 3.5686    | 3.9246  | 3.2353    | 3.7809  | 3.7293    | 3.5910  | 3.0604    | 3.4488  | 2.9547    |
|   | N | 7.1114  | 6.4764    | 8.3860  | 7.9498    | 7.1648  | 6.2263    | 6.8076  | 6.4940    | 7.8186  | 7.0299    | 9.7197  | 9.4681    | 8.1948  | 7.3534    | 7.8098  | 7.4871    |
|   | W | 15.4372 | 15.0466   | 12.9516 | 12.3782   | 11.3973 | 10.8741   | 9.5173  | 8.6465    | 9.0457  | 8.0864    | 8.6752  | 7.8724    | 8.2531  | 7.6846    | 7.8213  | 7.3213    |

|   |   | 18-Feb  |           | 19-Feb  |           | 20-Feb  |           | 21-Feb  |           | 22-Feb  |           | 23-Feb  |           | 24-Feb  |           | 25-Feb  |           |
|---|---|---------|-----------|---------|-----------|---------|-----------|---------|-----------|---------|-----------|---------|-----------|---------|-----------|---------|-----------|
|   |   | Natural | Optimized |
| S | D | 3.4480  | 3.1434    | 3.3754  | 2.7030    | 3.2275  | 2.8098    | 3.0539  | 2.3635    | 3.0106  | 2.5984    | 3.0654  | 2.5849    | 3.0950  | 2.7817    | 3.1562  | 2.5871    |
|   | N | 7.8037  | 7.4799    | 7.8720  | 7.3843    | 11.9543 | 11.4844   | 15.7759 | 15.3238   | 12.8725 | 12.4596   | 9.8458  | 8.6732    | 8.1697  | 7.8545    | 7.8028  | 7.3936    |
|   | W | 7.4962  | 6.2218    | 7.2444  | 6.2278    | 8.3657  | 7.9573    | 9.2730  | 8.4120    | 8.7926  | 7.9836    | 10.3963 | 9.6157    | 14.7863 | 14.4472   | 13.0764 | 12.3687   |

|   |   | 26-Feb  |           | 27-Feb  |           | 28-Feb  |           | 1-Mar   |           | 2-Mar   |           | 3-Mar   |           | 4-Mar   |           | 5-Mar   |           |
|---|---|---------|-----------|---------|-----------|---------|-----------|---------|-----------|---------|-----------|---------|-----------|---------|-----------|---------|-----------|
|   |   | Natural | Optimized |
| S | D | 3.7836  | 3.4432    | 5.1123  | 4.3975    | 4.5989  | 4.1939    | 4.9216  | 4.6839    | 5.3576  | 5.1038    | 5.6116  | 5.2736    | 6.5544  | 6.4718    | 8.8148  | 8.5601    |
|   | N | 7.8012  | 7.3909    | 7.9878  | 7.0528    | 10.4509 | 10.0862   | 11.9198 | 11.6490   | 10.5412 | 10.0278   | 10.9771 | 10.3815   | 12.5552 | 12.2145   | 13.8471 | 13.5940   |
|   | W | 12.2777 | 11.5278   | 11.5055 | 10.5656   | 9.1705  | 8.3098    | 8.1396  | 7.3829    | 7.8039  | 6.8696    | 7.6944  | 7.1989    | 7.5093  | 6.9778    | 7.1982  | 6.4696    |

|   |   | 6-Mar   |           | 7-Mar   |           | 8-Mar   |           | 9-Mar   |           | 10-Mar  |           | 11-Mar  |           | 12-Mar  |           | 13-Mar  |           |
|---|---|---------|-----------|---------|-----------|---------|-----------|---------|-----------|---------|-----------|---------|-----------|---------|-----------|---------|-----------|
|   |   | Natural | Optimized |
| S | D | 8.5864  | 8.3199    | 6.4772  | 5.9525    | 5.5845  | 4.6865    | 5.1615  | 4.9457    | 4.8999  | 4.3689    | 4.6734  | 4.4299    | 4.5104  | 3.8878    | 4.3855  | 4.0373    |
|   | N | 17.1226 | 16.8061   | 11.8383 | 11.4084   | 10.4361 | 9.9781    | 9.8414  | 9.2835    | 9.4635  | 9.0134    | 9.0982  | 8.4216    | 8.6483  | 8.2479    | 8.2029  | 7.5302    |
|   | W | 6.8094  | 5.1821    | 6.4120  | 5.4655    | 6.1372  | 5.2980    | 5.9552  | 4.5650    | 5.9586  | 5.4829    | 6.0216  | 4.9650    | 6.1866  | 5.2086    | 6.4799  | 5.5402    |

|   |   | 14-Mar  |           | 15-Mar  |           | 16-Mar  |           | 17-Mar  |           | 18-Mar  |           | 19-Mar  |           | 20-Mar  |           | 21-Mar  |           |
|---|---|---------|-----------|---------|-----------|---------|-----------|---------|-----------|---------|-----------|---------|-----------|---------|-----------|---------|-----------|
|   |   | Natural | Optimized |
| S | D | 4.2565  | 3.9005    | 4.0762  | 3.6728    | 3.9447  | 3.1724    | 4.0796  | 3.5735    | 4.2603  | 3.3998    | 5.2744  | 4.2768    | 6.5547  | 5.6764    | 5.6139  | 4.3377    |
|   | N | 7.7115  | 7.1958    | 7.2754  | 6.4271    | 6.8455  | 6.1373    | 6.4829  | 5.7376    | 6.1834  | 5.0151    | 6.8297  | 5.7280    | 7.8390  | 6.8405    | 6.6535  | 5.6038    |
|   | W | 6.8306  | 5.6089    | 6.9802  | 6.0654    | 7.0563  | 5.7148    | 7.1815  | 5.4488    | 7.0834  | 5.4957    | 6.8087  | 5.1562    | 6.4699  | 4.6151    | 6.1759  | 4.5104    |

|   |   | 22-Mar  |           | 23-Mar  |           | 24-Mar  |           | 25-Mar  |           | 26-Mar  |           | 27-Mar  |           | 28-Mar  |           | 29-Mar  |           |
|---|---|---------|-----------|---------|-----------|---------|-----------|---------|-----------|---------|-----------|---------|-----------|---------|-----------|---------|-----------|
|   |   | Natural | Optimized |
| S | D | 4.5790  | 3.4303    | 4.2768  | 3.1932    | 4.1283  | 2.7169    | 4.0052  | 2.7265    | 3.8982  | 2.8197    | 3.9584  | 2.7329    | 5.3337  | 4.2362    | 6.3549  | 5.1690    |
|   | N | 5.5910  | 4.0920    | 5.6560  | 4.5400    | 12.0547 | 10.9851   | 14.9598 | 13.9552   | 8.5633  | 7.2949    | 7.3997  | 6.3561    | 7.3082  | 5.8948    | 7.5194  | 6.5644    |
|   | W | 5.9103  | 4.0643    | 5.8599  | 4.3993    | 12.2058 | 10.6308   | 15.2464 | 13.7401   | 9.8862  | 8.3515    | 11.0741 | 9.0614    | 12.6458 | 11.2812   | 10.7939 | 8.7317    |

|   |   | 30-Mar  |           | 31-Mar  |           | 1-Apr   |           | 2-Apr   |           | 3-Apr   |           | 4-Apr   |           | 5-Apr   |           | 6-Apr   |           |
|---|---|---------|-----------|---------|-----------|---------|-----------|---------|-----------|---------|-----------|---------|-----------|---------|-----------|---------|-----------|
|   |   | Natural | Optimized |
| S | D | 5.3252  | 4.0268    | 5.1824  | 3.8890    | 5.1483  | 3.7045    | 5.0046  | 3.6775    | 10.1444 | 8.9890    | 12.7100 | 11.5487   | 6.8188  | 5.7047    | 5.4791  | 3.9489    |
|   | N | 7.7324  | 6.5971    | 7.8958  | 6.4195    | 7.6946  | 6.6637    | 7.4983  | 6.5540    | 7.3111  | 6.4937    | 7.6244  | 6.7226    | 13.9029 | 13.0314   | 15.2637 | 14.3860   |
|   | W | 12.3276 | 10.6292   | 12.9332 | 11.2585   | 13.7515 | 12.2431   | 17.3913 | 15.9856   | 14.9555 | 13.4831   | 10.3469 | 8.7366    | 8.6734  | 7.2409    | 8.3200  | 6.8539    |

|   |   | 7-Apr   |           | 8-Apr   |           | 9-Apr   |           | 10-Apr  |           | 11-Apr  |           | 12-Apr  |           | 13-Apr  |           | 14-Apr  |           |
|---|---|---------|-----------|---------|-----------|---------|-----------|---------|-----------|---------|-----------|---------|-----------|---------|-----------|---------|-----------|
|   |   | Natural | Optimized |
| S | D | 5.2005  | 3.8899    | 5.1213  | 4.0583    | 5.0586  | 3.6675    | 6.9466  | 5.7742    | 8.8957  | 7.6801    | 6.6243  | 5.4591    | 5.8371  | 4.6557    | 5.8437  | 4.7285    |
|   | N | 8.4938  | 7.3629    | 6.7886  | 5.5873    | 7.1917  | 6.2523    | 8.7546  | 7.6861    | 7.5038  | 6.4876    | 7.4705  | 6.1821    | 7.9810  | 6.9659    | 8.5179  | 7.5668    |
|   | W | 8.2358  | 6.5014    | 8.7917  | 7.0663    | 9.6592  | 7.8611    | 8.1310  | 6.2366    | 7.7902  | 5.7418    | 7.7870  | 6.4488    | 7.9391  | 6.0767    | 7.9975  | 5.8931    |

|   |   | 15-Apr  |           | 16-Apr  |           | 17-Apr  |           | 18-Apr  |           | 19-Apr  |           | 20-Apr  |           | 21-Apr  |           | 22-Apr  |           |
|---|---|---------|-----------|---------|-----------|---------|-----------|---------|-----------|---------|-----------|---------|-----------|---------|-----------|---------|-----------|
|   |   | Natural | Optimized |
| S | D | 6.0217  | 4.7900    | 6.1592  | 4.9091    | 6.2263  | 5.0510    | 6.1975  | 5.0741    | 6.0347  | 4.6672    | 10.8383 | 9.7861    | 14.1574 | 13.1609   | 15.7554 | 14.7685   |
|   | N | 8.8553  | 8.0381    | 9.0656  | 7.5580    | 9.1081  | 8.2979    | 8.9783  | 7.9460    | 8.7938  | 7.9447    | 8.5956  | 7.5281    | 8.3941  | 7.6058    | 8.2986  | 7.0604    |
|   | W | 7.8833  | 6.1861    | 7.6890  | 5.8771    | 7.5705  | 6.0096    | 7.7101  | 5.8845    | 7.8908  | 5.8875    | 8.0227  | 6.0726    | 8.1542  | 6.6081    | 8.1841  | 6.6429    |

|   |   | 23-Apr  |           | 24-Apr  |           | 25-Apr  |           | 26-Apr  |           | 27-Apr  |           | 28-Apr  |           | 29-Apr  |           | 30-Apr  |           |
|---|---|---------|-----------|---------|-----------|---------|-----------|---------|-----------|---------|-----------|---------|-----------|---------|-----------|---------|-----------|
|   |   | Natural | Optimized |
| S | D | 17.7058 | 16.7750   | 13.3488 | 12.3881   | 9.8111  | 8.9239    | 8.7121  | 7.8760    | 7.3318  | 6.6529    | 8.0333  | 7.3522    | 7.1511  | 6.2447    | 6.8859  | 6.0621    |
|   | N | 8.1611  | 7.2953    | 7.9052  | 6.6133    | 7.6453  | 6.3234    | 7.4739  | 6.1458    | 7.1905  | 6.4652    | 6.7995  | 5.7268    | 6.4177  | 5.4023    | 6.1184  | 5.0940    |
|   | W | 8.0410  | 6.6781    | 7.7836  | 5.6901    | 7.8137  | 6.4130    | 8.9584  | 7.7681    | 7.9468  | 6.7389    | 7.7298  | 6.3123    | 7.7552  | 5.9696    | 7.8824  | 6.9869    |

|   |   | 1-May   |           | 2-May   |           | 3-May   |           | 4-May   |           | 5-May   |           | 6-May   |           | 7-May   |           | 8-May   |           |
|---|---|---------|-----------|---------|-----------|---------|-----------|---------|-----------|---------|-----------|---------|-----------|---------|-----------|---------|-----------|
|   |   | Natural | Optimized |
| S | D | 6.4244  | 6.1201    | 6.2095  | 5.6812    | 5.8676  | 5.6303    | 5.4689  | 4.9159    | 5.1952  | 4.6827    | 5.2268  | 4.4804    | 6.2950  | 6.1197    | 7.5646  | 7.0481    |
|   | N | 7.0488  | 6.3545    | 8.4384  | 8.2554    | 6.1000  | 5.8327    | 7.3336  | 6.6260    | 12.3509 | 12.1350   | 11.1608 | 11.0245   | 10.0151 | 9.7028    | 13.3469 | 13.1240   |
|   | W | 9.7913  | 8.9231    | 14.8507 | 14.2464   | 14.9078 | 14.4416   | 14.2000 | 14.0951   | 16.7144 | 16.5044   | 13.9847 | 13.7960   | 12.1086 | 11.7335   | 13.1152 | 12.9151   |

|   |   | 9-May   |           | 10-May  |           | 11-May  |           | 12-May  |           | 13-May  |           | 14-May  |           | 15-May  |           | 16-May  |           |
|---|---|---------|-----------|---------|-----------|---------|-----------|---------|-----------|---------|-----------|---------|-----------|---------|-----------|---------|-----------|
|   |   | Natural | Optimized |
| S | D | 5.9789  | 5.7231    | 9.6424  | 9.5245    | 13.0555 | 12.9337   | 11.7906 | 11.7157   | 9.4617  | 9.0890    | 5.9519  | 5.6684    | 5.0001  | 4.4944    | 4.6890  | 4.0250    |
|   | N | 13.0348 | 12.8200   | 12.4283 | 11.8218   | 15.1126 | 14.9642   | 14.3281 | 14.1324   | 12.4094 | 12.1097   | 8.2627  | 7.0518    | 7.3048  | 6.9205    | 7.0646  | 6.6622    |
|   | W | 10.6102 | 9.8567    | 8.1731  | 7.3364    | 7.4299  | 6.3583    | 7.7709  | 7.2887    | 7.9114  | 7.3612    | 6.9713  | 6.0879    | 6.7397  | 5.7884    | 6.5895  | 6.0202    |

|   |   | 17-May  |           | 18-May  |           | 19-May  |           | 20-May  |           | 21-May  |           | 22-May  |           | 23-May  |           | 24-May  |           |
|---|---|---------|-----------|---------|-----------|---------|-----------|---------|-----------|---------|-----------|---------|-----------|---------|-----------|---------|-----------|
|   |   | Natural | Optimized |
| S | D | 4.6842  | 4.2811    | 4.8680  | 4.2299    | 4.6836  | 4.2398    | 4.6400  | 3.9325    | 4.5322  | 3.8337    | 4.3725  | 3.8258    | 4.1514  | 3.6580    | 3.9079  | 3.5854    |
|   | N | 7.1129  | 6.8922    | 7.3316  | 6.9291    | 7.0418  | 6.4214    | 6.7568  | 6.1000    | 6.4211  | 5.6896    | 6.0409  | 5.4981    | 5.6393  | 5.1248    | 5.2253  | 4.7084    |
|   | W | 6.3784  | 5.9962    | 6.0998  | 4.6354    | 7.4694  | 6.8675    | 9.0098  | 8.5039    | 6.1314  | 5.1889    | 5.3087  | 4.4848    | 4.9284  | 3.9976    | 9.5318  | 8.8629    |

|   |   | 25-May  |           | 26-May  |           | 27-May  |           | 28-May  |           | 29-May  |           | 30-May  |           | 31-May  |           | 1-Jun   |           |
|---|---|---------|-----------|---------|-----------|---------|-----------|---------|-----------|---------|-----------|---------|-----------|---------|-----------|---------|-----------|
|   |   | Natural | Optimized |
| S | D | 3.6902  | 3.0581    | 3.5172  | 2.9724    | 3.4828  | 3.0123    | 3.5260  | 2.6913    | 3.4655  | 2.6083    | 3.4180  | 2.4118    | 3.4156  | 3.0697    | 3.4484  | 2.2524    |
|   | N | 4.8861  | 4.1581    | 4.5452  | 3.5361    | 4.2268  | 3.6242    | 3.8928  | 2.9735    | 3.5793  | 2.4379    | 3.3399  | 2.7041    | 3.1135  | 2.3958    | 2.9372  | 1.8920    |
|   | W | 12.1865 | 11.4899   | 7.3804  | 6.3897    | 4.9409  | 3.9684    | 4.2585  | 2.9157    | 4.0551  | 2.9437    | 4.1308  | 3.3421    | 4.2041  | 3.2120    | 4.1204  | 2.4090    |

|   |   | 2-Jun   |           | 3-Jun   |           | 4-Jun   |           | 5-Jun   |           | 6-Jun   |           | 7-Jun   |           | 8-Jun   |           | 9-Jun   |           |
|---|---|---------|-----------|---------|-----------|---------|-----------|---------|-----------|---------|-----------|---------|-----------|---------|-----------|---------|-----------|
|   |   | Natural | Optimized |
| S | D | 3.4800  | 2.1155    | 3.5952  | 2.3733    | 3.7703  | 2.4896    | 4.1821  | 2.9407    | 4.3758  | 3.1174    | 4.2881  | 2.9983    | 4.0889  | 2.8487    | 3.8261  | 2.7831    |
|   | N | 2.8075  | 1.7075    | 2.7409  | 1.3328    | 2.6757  | 1.3124    | 2.7528  | 1.7400    | 2.9401  | 1.6693    | 3.0405  | 1.8480    | 3.1155  | 1.6577    | 3.1359  | 1.7055    |
|   | W | 4.0044  | 2.3777    | 3.8554  | 2.1549    | 3.8292  | 2.0298    | 3.9477  | 2.3039    | 4.0790  | 2.4548    | 4.1741  | 2.6887    | 4.3431  | 2.5066    | 4.4125  | 2.8613    |

|   |   | 10-Jun  |           | 11-Jun  |           | 12-Jun  |           | 13-Jun  |           | 14-Jun  |           | 15-Jun  |           | 16-Jun  |           | 17-Jun  |           |
|---|---|---------|-----------|---------|-----------|---------|-----------|---------|-----------|---------|-----------|---------|-----------|---------|-----------|---------|-----------|
|   |   | Natural | Optimized |
| S | D | 3.6138  | 2.2481    | 3.5080  | 2.4204    | 3.3179  | 2.1222    | 3.0836  | 1.9186    | 2.9190  | 1.7955    | 2.7490  | 1.5626    | 2.5728  | 1.3991    | 2.4411  | 1.2127    |
|   | N | 3.0616  | 1.7574    | 2.9328  | 1.8695    | 2.7835  | 1.4517    | 2.6332  | 1.2372    | 2.5159  | 1.3677    | 2.5247  | 1.4584    | 2.5095  | 1.3153    | 2.4507  | 1.2332    |
|   | W | 4.4035  | 2.5182    | 4.3377  | 2.7233    | 4.2673  | 2.7453    | 4.0965  | 2.4414    | 3.9731  | 2.0430    | 3.7865  | 2.0126    | 3.5711  | 1.7456    | 3.3354  | 1.5510    |

|   |   | 18-Jun  |           | 19-Jun  |           | 20-Jun  |           | 21-Jun  |           | 22-Jun  |           | 23-Jun  |           | 24-Jun  |           | 25-Jun  |           |
|---|---|---------|-----------|---------|-----------|---------|-----------|---------|-----------|---------|-----------|---------|-----------|---------|-----------|---------|-----------|
|   |   | Natural | Optimized |
| S | D | 2.3449  | 1.0250    | 2.2678  | 1.1944    | 2.2293  | 1.0381    | 2.1730  | 0.9874    | 2.1482  | 0.8879    | 2.1831  | 1.1021    | 2.1393  | 1.0597    | 2.0576  | 0.7790    |
|   | N | 2.4474  | 1.3794    | 2.4024  | 1.3678    | 2.5742  | 1.4411    | 3.4546  | 2.2365    | 2.6913  | 1.4838    | 2.4252  | 1.2683    | 2.3790  | 1.2935    | 2.3356  | 1.1165    |
|   | W | 3.0952  | 1.4886    | 2.8781  | 1.1440    | 2.7659  | 1.2533    | 5.0593  | 3.7061    | 10.4695 | 9.0091    | 9.4238  | 8.0353    | 5.6661  | 3.9214    | 3.6694  | 1.7337    |

|   |   | 26-Jun  |           | 27-Jun  |           | 28-Jun  |           | 29-Jun  |           | 30-Jun  |           | 1-Jul   |           | 2-Jul   |           | 3-Jul   |           |
|---|---|---------|-----------|---------|-----------|---------|-----------|---------|-----------|---------|-----------|---------|-----------|---------|-----------|---------|-----------|
|   |   | Natural | Optimized |
| S | D | 1.9761  | 0.8550    | 1.9600  | 0.6438    | 1.9864  | 0.8002    | 2.0888  | 0.8909    | 2.1206  | 0.8064    | 2.0721  | 0.8746    | 2.2631  | 1.1344    | 2.4663  | 1.4647    |
|   | N | 2.2649  | 1.0827    | 2.1702  | 1.0538    | 2.0726  | 0.9011    | 1.9929  | 0.9982    | 1.9641  | 0.8283    | 2.0326  | 0.9179    | 2.0276  | 1.0315    | 2.0064  | 0.7721    |
|   | W | 3.2107  | 1.7351    | 3.1207  | 1.2491    | 3.0628  | 1.4453    | 2.9542  | 1.5014    | 2.8148  | 1.2192    | 2.7863  | 1.3714    | 2.7201  | 1.3191    | 2.6770  | 1.0216    |

|   |   | 4-Jul   |           | 5-Jul   |           | 6-Jul   |           | 7-Jul   |           | 8-Jul   |           | 9-Jul   |           | 10-Jul  |           | 11-Jul  |           |
|---|---|---------|-----------|---------|-----------|---------|-----------|---------|-----------|---------|-----------|---------|-----------|---------|-----------|---------|-----------|
|   |   | Natural | Optimized |
| S | D | 2.5841  | 1.2173    | 2.7360  | 1.4799    | 2.8308  | 1.8191    | 2.7985  | 1.5064    | 2.6842  | 1.4747    | 2.5308  | 1.3647    | 2.4426  | 1.2294    | 2.5570  | 1.2607    |
|   | N | 2.1015  | 0.8322    | 2.9099  | 1.8326    | 2.6012  | 1.4424    | 2.6292  | 1.4291    | 2.6762  | 1.2592    | 2.6354  | 1.6551    | 2.5394  | 1.1901    | 2.4362  | 1.1849    |
|   | W | 2.5836  | 0.9722    | 2.5489  | 0.9360    | 2.6547  | 0.9730    | 2.8442  | 1.3590    | 3.0911  | 1.2808    | 3.1771  | 1.5818    | 3.2197  | 1.6556    | 3.1577  | 1.1913    |

|   |   | 12-Jul   |            | 13-Jul  |           | 14-Jul  |           | 15-Jul  |           | 16-Jul  |           | 17-Jul  |           | 18-Jul  |           | 19-Jul  |           |
|---|---|----------|------------|---------|-----------|---------|-----------|---------|-----------|---------|-----------|---------|-----------|---------|-----------|---------|-----------|
|   |   | Natural  | Optimized  | Natural | Optimized | Natural | Optimized | Natural | Optimized | Natural | Optimized | Natural | Optimized | Natural | Optimized | Natural | Optimized |
| S | D | 2.5411   | 1.3788     | 2.4149  | 1.2422    | 2.2672  | 1.2680    | 2.2882  | 1.0140    | 2.8442  | 1.5298    | 4.0138  | 2.6622    | 2.9008  | 1.6371    | 2.6293  | 1.3576    |
|   | N | 2.2927   | 1.0867     | 2.1370  | 0.8955    | 1.9899  | 0.9112    | 1.8585  | 0.6819    | 1.7445  | 0.5795    | 1.6468  | 0.5953    | 1.5645  | 0.5223    | 1.5016  | 0.4833    |
|   | W | 3.0057   | 1.6364     | 2.8135  | 1.2734    | 2.6140  | 1.1469    | 2.4226  | 0.9136    | 2.2471  | 0.7356    | 2.0911  | 0.6730    | 1.9683  | 0.5854    | 1.8758  | 0.4367    |
|   |   | 20-Jul   |            | 21-Jul  |           | 22-Jul  |           | 23-Jul  |           | 24-Jul  |           | 25-Jul  |           | 26-Jul  |           | 27-Jul  |           |
|   |   | Natural  | Optimized  | Natural | Optimized | Natural | Optimized | Natural | Optimized | Natural | Optimized | Natural | Optimized | Natural | Optimized | Natural | Optimized |
| S | D | 2.5121   | 1.3944     | 2.3649  | 1.3486    | 2.1981  | 1.0016    | 2.0356  | 0.9168    | 1.8908  | 0.5690    | 1.7669  | 0.5885    | 1.6646  | 0.5476    | 1.5802  | 0.5150    |
|   | N | 1.5252   | 0.5108     | 1.5284  | 0.4726    | 1.4940  | 0.4691    | 1.4457  | 0.4599    | 1.3997  | 0.4366    | 1.3553  | 0.4428    | 1.3141  | 0.2612    | 1.3155  | 0.3619    |
|   | W | 1.7803   | 0.4321     | 1.6930  | 0.3643    | 1.6342  | 0.2609    | 1.5806  | 0.2623    | 1.5266  | 0.2456    | 1.4767  | 0.1707    | 1.4324  | 0.2028    | 1.3946  | 0.1518    |
|   |   | 28-Jul   |            | 29-Jul  |           | 30-Jul  |           | 31-Jul  |           | 1-Aug   |           | 2-Aug   |           | 3-Aug   |           | 4-Aug   |           |
|   |   | Natural  | Optimized  | Natural | Optimized | Natural | Optimized | Natural | Optimized | Natural | Optimized | Natural | Optimized | Natural | Optimized | Natural | Optimized |
| S | D | 1.5117   | 0.4798     | 1.4558  | 0.3264    | 1.4097  | 0.3376    | 1.3713  | 0.3028    | 1.3788  | 0.3191    | 1.3491  | 0.2881    | 1.3229  | 0.2891    | 1.3297  | 0.2558    |
|   | N | 1.3033   | 0.3150     | 1.2767  | 0.2953    | 1.2596  | 0.3063    | 1.2304  | 0.2909    | 1.2145  | 0.2713    | 1.7020  | 0.6097    | 2.9712  | 1.5183    | 2.0623  | 1.0605    |
|   | W | 1.3989   | 0.1550     | 1.3835  | 0.1691    | 1.3486  | 0.1341    | 1.3130  | 0.0979    | 1.3095  | 0.0828    | 1.2787  | 0.0531    | 1.2620  | 0.0546    | 1.2408  | 0.0309    |
|   |   | 5-Aug    |            | 6-Aug   |           | 7-Aug   |           | 8-Aug   |           | 9-Aug   |           | 10-Aug  |           | 11-Aug  |           | 12-Aug  |           |
|   |   | Natural  | Optimized  | Natural | Optimized | Natural | Optimized | Natural | Optimized | Natural | Optimized | Natural | Optimized | Natural | Optimized | Natural | Optimized |
| S | D | 1.3883   | 0.2808     | 1.4116  | 0.3568    | 1.4286  | 0.3996    | 1.3965  | 0.3509    | 1.3471  | 0.2989    | 1.2993  | 0.1974    | 1.2576  | 0.1855    | 1.2207  | 0.2405    |
|   | N | 1.9490   | 0.7974     | 1.9227  | 0.7196    | 1.9091  | 0.7914    | 1.8306  | 0.6511    | 1.7270  | 0.6933    | 1.7017  | 0.5625    | 1.6379  | 0.5742    | 1.5459  | 0.5352    |
|   | W | 1.2147   | 0.0247     | 1.1897  | 0.0115    | 1.1899  | 0.0050    | 1.2581  | 0.0507    | 1.2962  | 0.0774    | 1.3164  | 0.0982    | 1.2902  | 0.0517    | 1.2393  | 0.0364    |
|   |   | 13-Aug   |            | 14-Aug  |           | 15-Aug  |           | 16-Aug  |           | 17-Aug  |           | 18-Aug  |           | 19-Aug  |           | 20-Aug  |           |
|   |   | Natural  | Optimized  | Natural | Optimized | Natural | Optimized | Natural | Optimized | Natural | Optimized | Natural | Optimized | Natural | Optimized | Natural | Optimized |
| S | D | 1.1895   | 0.2084     | 1.1617  | 0.1634    | 1.1368  | 0.1294    | 1.1143  | 0.1265    | 1.0931  | 0.1122    | 1.0732  | 0.0823    | 1.0544  | 0.0946    | 1.0358  | 0.0558    |
|   | N | 1.4532   | 0.4604     | 1.3506  | 0.3193    | 1.2541  | 0.2767    | 1.1709  | 0.1992    | 1.1025  | 0.1271    | 1.0467  | 0.1412    | 1.0013  | 0.0879    | 0.9639  | 0.0551    |
|   | W | 1.1871   | 0.0138     | 1.1409  | 0.0076    | 1.1039  | 0.0136    | 1.1142  | 0.0128    | 1.1051  | 0.0057    | 1.0746  | 0.0050    | 1.0411  | 0.0091    | 1.0104  | 0.0100    |
|   |   | 21-Aug   |            | 22-Aug  |           | 23-Aug  |           | 24-Aug  |           | 25-Aug  |           | 26-Aug  |           | 27-Aug  |           | 28-Aug  |           |
|   |   | Natural  | Optimized  | Natural | Optimized | Natural | Optimized | Natural | Optimized | Natural | Optimized | Natural | Optimized | Natural | Optimized | Natural | Optimized |
| S | D | 1.0180   | 0.0598     | 1.0005  | 0.0354    | 0.9832  | 0.0250    | 0.9664  | 0.0202    | 0.9545  | 0.0087    | 1.6778  | 0.4990    | 2.9627  | 1.6082    | 1.8227  | 0.6715    |
|   | N | 0.9330   | 0.0387     | 0.9071  | 0.0205    | 0.8845  | 0.0130    | 0.8644  | 0.0024    | 0.8465  | 0.0007    | 0.8298  | 0.0030    | 2.2559  | 0.8518    | 3.6919  | 2.4160    |
|   | W | 1.4241   | 0.1638     | 3.1455  | 1.5704    | 3.0259  | 1.1505    | 4.0745  | 2.3095    | 11.3647 | 9.5451    | 26.9707 | 25.7634   | 32.8884 | 31.6406   | 17.6805 | 16.3611   |
|   |   | 29-Aug   |            | 30-Aug  |           | 31-Aug  |           | 1-Sep   |           | 2-Sep   |           | 3-Sep   |           | 4-Sep   |           | 5-Sep   |           |
|   |   | Natural  | Optimized  | Natural | Optimized | Natural | Optimized | Natural | Optimized | Natural | Optimized | Natural | Optimized | Natural | Optimized | Natural | Optimized |
| S | D | 1.52945  | 0.3901043  | 1.3858  | 0.2865    | 1.2830  | 0.2865    | 1.1551  | 0.9576    | 1.1356  | 0.6538    | 1.0958  | 0.7947    | 1.0393  | 0.8279    | 0.9842  | 0.6840    |
|   | N | 1.849235 | 0.64480258 | 1.4079  | 0.3838    | 1.2491  | 0.3025    | 1.1095  | 0.8053    | 1.0397  | 0.7965    | 0.9731  | 0.6915    | 0.9127  | 0.6279    | 0.8607  | 0.5660    |
|   | W | 5.864919 | 4.10378229 | 3.1877  | 1.7329    | 2.6695  | 1.1631    | 2.3503  | 1.9257    | 2.3040  | 1.7896    | 2.1960  | 1.5901    | 2.0497  | 1.5053    | 1.8879  | 1.7056    |
|   |   | 6-Sep    |            | 7-Sep   |           | 8-Sep   |           | 9-Sep   |           | 10-Sep  |           | 11-Sep  |           | 12-Sep  |           | 13-Sep  |           |
|   |   | Natural  | Optimized  | Natural | Optimized | Natural | Optimized | Natural | Optimized | Natural | Optimized | Natural | Optimized | Natural | Optimized | Natural | Optimized |
| S | D | 0.9368   | 0.7161     | 0.8966  | 0.6224    | 0.8640  | 0.6068    | 0.8364  | 0.5433    | 0.8131  | 0.5549    | 0.7934  | 0.5842    | 0.7758  | 0.4810    | 0.7602  | 0.5578    |
|   | N | 0.8162   | 0.5078     | 0.7794  | 0.5489    | 0.7838  | 0.4956    | 0.8525  | 0.5521    | 0.8696  | 0.6514    | 0.8485  | 0.5897    | 0.8134  | 0.6067    | 0.7741  | 0.4934    |
|   | W | 1.7254   | 1.2292     | 1.5706  | 1.1299    | 1.4280  | 0.9838    | 1.3011  | 0.7195    | 1.1902  | 0.6605    | 1.0952  | 0.8452    | 1.0151  | 0.5393    | 0.9808  | 0.6307    |



|   |   | 14-Sep  |           | 15-Sep  |           | 16-Sep  |           | 17-Sep  |           | 18-Sep  |           | 19-Sep  |           | 20-Sep  |           | 21-Sep  |           |
|---|---|---------|-----------|---------|-----------|---------|-----------|---------|-----------|---------|-----------|---------|-----------|---------|-----------|---------|-----------|
|   |   | Natural | Optimized |
| S | D | 0.7455  | 0.4709    | 0.7320  | 0.4538    | 0.7188  | 0.4303    | 0.7065  | 0.5100    | 0.6940  | 0.4278    | 0.6826  | 0.4147    | 0.6917  | 0.4256    | 0.7398  | 0.5500    |
|   | N | 0.7378  | 0.5235    | 0.7063  | 0.4864    | 0.7115  | 0.4555    | 0.7792  | 0.3338    | 0.8229  | 0.6472    | 0.7974  | 0.5185    | 0.8106  | 0.5371    | 0.9826  | 0.6980    |
|   | W | 1.1248  | 0.8614    | 1.2496  | 0.7964    | 1.2572  | 0.8864    | 1.2330  | 0.7046    | 1.1916  | 0.8596    | 1.1586  | 0.7754    | 1.1578  | 0.7787    | 1.1730  | 0.7818    |

|   |   | 22-Sep  |           | 23-Sep  |           | 24-Sep  |           | 25-Sep  |           | 26-Sep  |           | 27-Sep  |           | 28-Sep  |           | 29-Sep  |           |
|---|---|---------|-----------|---------|-----------|---------|-----------|---------|-----------|---------|-----------|---------|-----------|---------|-----------|---------|-----------|
|   |   | Natural | Optimized |
| S | D | 0.7554  | 0.5581    | 0.8421  | 0.5358    | 0.9404  | 0.6220    | 1.0365  | 0.6874    | 1.1944  | 0.9658    | 1.3052  | 0.8581    | 1.3674  | 1.0723    | 1.3562  | 1.0849    |
|   | N | 1.1017  | 0.7723    | 1.1102  | 0.6635    | 1.1255  | 0.8698    | 1.1015  | 0.6695    | 1.0936  | 0.6342    | 10.7247 | 10.0813   | 17.5891 | 17.3877   | 9.8326  | 9.6637    |
|   | W | 1.3118  | 1.0718    | 1.5769  | 1.2108    | 1.9805  | 1.2219    | 2.2870  | 1.3359    | 2.4354  | 1.8032    | 6.4889  | 5.9912    | 8.5096  | 7.9388    | 4.9894  | 4.2672    |

|   |   | 30-Sep  |           | 1-Oct   |           | 2-Oct   |           | 3-Oct   |           | 4-Oct   |           | 5-Oct   |           | 6-Oct   |           | 7-Oct   |           |
|---|---|---------|-----------|---------|-----------|---------|-----------|---------|-----------|---------|-----------|---------|-----------|---------|-----------|---------|-----------|
|   |   | Natural | Optimized |
| S | D | 1.2969  | 0.9542    | 1.1773  | 0.1700    | 1.2374  | 0.2163    | 1.3863  | 0.3214    | 1.5022  | 0.4635    | 1.5845  | 0.5207    | 1.5918  | 0.4458    | 1.5099  | 0.3789    |
|   | N | 6.2029  | 5.6377    | 2.9015  | 1.7289    | 2.2535  | 0.8818    | 2.1350  | 0.9233    | 2.1156  | 1.0217    | 2.1014  | 1.0320    | 2.1161  | 0.9128    | 2.0443  | 1.0367    |
|   | W | 5.7725  | 5.3002    | 3.6169  | 1.8947    | 3.1421  | 1.5520    | 3.1242  | 1.6004    | 7.6494  | 6.1489    | 25.4186 | 24.1455   | 30.2901 | 28.9340   | 20.2852 | 18.9737   |

|   |   | 8-Oct   |           | 9-Oct   |           | 10-Oct  |           | 11-Oct  |           | 12-Oct  |           | 13-Oct  |           | 14-Oct  |           | 15-Oct  |           |
|---|---|---------|-----------|---------|-----------|---------|-----------|---------|-----------|---------|-----------|---------|-----------|---------|-----------|---------|-----------|
|   |   | Natural | Optimized |
| S | D | 1.4399  | 0.3282    | 1.3532  | 0.3299    | 1.2881  | 0.2631    | 1.2656  | 0.2316    | 1.2076  | 0.2071    | 1.8389  | 0.6029    | 3.0687  | 1.7698    | 1.9005  | 0.8051    |
|   | N | 1.9072  | 0.6985    | 1.8051  | 0.6016    | 1.7745  | 0.6880    | 1.6892  | 0.4974    | 1.5765  | 0.5370    | 1.5210  | 0.4659    | 1.5920  | 0.4686    | 1.6083  | 0.4765    |
|   | W | 16.3206 | 14.8188   | 14.7483 | 13.3618   | 14.3347 | 12.9802   | 12.4702 | 11.1529   | 9.1980  | 7.4608    | 7.9880  | 6.2630    | 7.6522  | 5.6240    | 7.4519  | 6.0296    |

|   |   | 16-Oct  |           | 17-Oct  |           | 18-Oct  |           | 19-Oct  |           | 20-Oct  |           | 21-Oct  |           | 22-Oct  |           | 23-Oct  |           |
|---|---|---------|-----------|---------|-----------|---------|-----------|---------|-----------|---------|-----------|---------|-----------|---------|-----------|---------|-----------|
|   |   | Natural | Optimized |
| S | D | 1.7236  | 0.5720    | 1.7253  | 0.4519    | 1.7144  | 0.6342    | 1.6830  | 0.4644    | 2.0260  | 0.7577    | 3.3395  | 2.2814    | 2.3925  | 1.1296    | 2.3433  | 1.3143    |
|   | N | 1.6492  | 0.5773    | 1.6809  | 0.4799    | 1.6781  | 0.5851    | 1.7291  | 0.5318    | 1.8553  | 0.7855    | 1.9362  | 0.8112    | 1.9646  | 0.8525    | 1.9078  | 0.6215    |
|   | W | 7.4072  | 5.6920    | 7.4482  | 5.7782    | 7.3653  | 5.5991    | 7.4474  | 4.8515    | 7.4316  | 5.7609    | 7.3134  | 5.7374    | 8.4531  | 6.7027    | 13.4410 | 12.0682   |

|   |   | 24-Oct  |           | 25-Oct  |           | 26-Oct  |           | 27-Oct  |           | 28-Oct  |           | 29-Oct  |           | 30-Oct  |           | 31-Oct  |           |
|---|---|---------|-----------|---------|-----------|---------|-----------|---------|-----------|---------|-----------|---------|-----------|---------|-----------|---------|-----------|
|   |   | Natural | Optimized |
| S | D | 2.5711  | 1.4334    | 2.6796  | 1.5318    | 2.6292  | 1.3578    | 2.5363  | 1.4659    | 2.6110  | 1.4194    | 2.6551  | 1.6187    | 2.6638  | 1.5686    | 2.7915  | 1.6076    |
|   | N | 1.7890  | 0.6003    | 1.6431  | 0.5686    | 1.5113  | 0.3991    | 1.3855  | 0.3480    | 1.3430  | 0.3518    | 1.2682  | 0.2575    | 1.1648  | 0.2096    | 1.0947  | 0.1674    |
|   | W | 11.8480 | 10.4146   | 8.7991  | 7.2913    | 9.1711  | 7.6015    | 6.9885  | 5.2715    | 6.2949  | 4.7133    | 5.9132  | 4.3694    | 8.0965  | 6.0660    | 9.0093  | 7.4512    |

|   |   | 1-Nov   |           | 2-Nov   |           | 3-Nov   |           | 4-Nov   |           | 5-Nov   |           | 6-Nov   |           | 7-Nov   |           | 8-Nov   |           |
|---|---|---------|-----------|---------|-----------|---------|-----------|---------|-----------|---------|-----------|---------|-----------|---------|-----------|---------|-----------|
|   |   | Natural | Optimized |
| S | D | 2.9771  | 1.6847    | 3.0125  | 1.5303    | 3.1773  | 2.0319    | 3.2931  | 2.1834    | 3.5885  | 2.5129    | 6.1260  | 4.8771    | 6.3180  | 5.1842    | 5.0973  | 3.6703    |
|   | N | 1.1943  | 0.1961    | 1.3106  | 0.3286    | 1.3727  | 0.4079    | 1.5797  | 0.4469    | 2.1670  | 1.0331    | 2.7304  | 1.5004    | 4.3701  | 2.8853    | 3.2863  | 2.1982    |
|   | W | 5.7257  | 3.1375    | 4.7647  | 2.4272    | 4.4774  | 2.7557    | 4.4685  | 3.0406    | 4.5189  | 2.9150    | 4.4916  | 2.7266    | 4.2842  | 2.5924    | 3.9757  | 2.2810    |

|   |   | 9-Nov   |           | 10-Nov  |           | 11-Nov  |           | 12-Nov  |           | 13-Nov  |           | 14-Nov  |           | 15-Nov  |           | 16-Nov  |           |
|---|---|---------|-----------|---------|-----------|---------|-----------|---------|-----------|---------|-----------|---------|-----------|---------|-----------|---------|-----------|
|   |   | Natural | Optimized |
| S | D | 4.8060  | 3.5922    | 4.6694  | 3.5772    | 4.5538  | 3.1026    | 4.4774  | 2.9603    | 6.4936  | 5.2165    | 8.1117  | 7.1117    | 5.2935  | 4.3082    | 4.5837  | 3.3500    |
|   | N | 3.1422  | 1.9422    | 11.5229 | 10.5560   | 19.0863 | 18.0476   | 11.7063 | 10.6288   | 6.8339  | 5.4557    | 5.9757  | 4.8146    | 6.1514  | 4.5122    | 6.5231  | 5.4916    |
|   | W | 3.6798  | 2.1422    | 3.5327  | 1.4782    | 3.4449  | 1.7786    | 5.5205  | 3.6550    | 7.5281  | 6.0633    | 5.2497  | 3.7623    | 5.3719  | 3.7031    | 5.9470  | 4.1866    |

|   |   | 17-Nov  |           | 18-Nov  |           | 19-Nov  |           | 20-Nov  |           | 21-Nov  |           | 22-Nov  |           | 23-Nov  |           | 24-Nov  |           |
|---|---|---------|-----------|---------|-----------|---------|-----------|---------|-----------|---------|-----------|---------|-----------|---------|-----------|---------|-----------|
|   |   | Natural | Optimized |
| S | D | 4.6373  | 3.4983    | 4.7711  | 3.5476    | 4.9577  | 3.7909    | 5.1780  | 4.1034    | 5.4225  | 4.1860    | 5.7324  | 4.4107    | 6.1215  | 5.0690    | 6.4319  | 5.4832    |
|   | N | 6.8663  | 5.9431    | 7.1498  | 6.2140    | 9.7985  | 8.8578    | 20.4104 | 19.3965   | 21.9968 | 21.1020   | 13.1975 | 12.2078   | 8.4870  | 7.2448    | 10.9112 | 9.8408    |
|   | W | 8.4686  | 6.9315    | 10.7413 | 9.2208    | 10.8529 | 9.5326    | 18.3932 | 17.0213   | 17.4201 | 16.0844   | 11.8470 | 10.4315   | 10.3684 | 8.8995    | 8.6730  | 7.2564    |

|   |   | 25-Nov  |           | 26-Nov  |           | 27-Nov  |           | 28-Nov  |           | 29-Nov  |           | 30-Nov  |           | 1-Dec   |           | 2-Dec   |           |
|---|---|---------|-----------|---------|-----------|---------|-----------|---------|-----------|---------|-----------|---------|-----------|---------|-----------|---------|-----------|
|   |   | Natural | Optimized |
| S | D | 6.4513  | 5.5015    | 6.4030  | 5.0514    | 9.1374  | 8.1889    | 9.1685  | 8.2012    | 7.0362  | 5.9620    | 8.5219  | 7.4617    | 11.8651 | 11.7668   | 10.0751 | 9.8741    |
|   | N | 18.4944 | 17.4275   | 25.0210 | 24.0459   | 19.0425 | 18.0886   | 14.4285 | 13.5063   | 11.0000 | 9.9628    | 7.6894  | 6.2212    | 6.7946  | 6.4621    | 11.4421 | 10.1463   |
|   | W | 10.7975 | 9.1686    | 13.4020 | 12.1649   | 13.2082 | 10.9470   | 12.4569 | 10.9623   | 13.4205 | 11.9724   | 18.5991 | 17.2300   | 15.0131 | 14.7765   | 9.6899  | 9.1857    |

|   |   | 3-Dec   |           | 4-Dec   |           | 5-Dec   |           | 6-Dec   |           | 7-Dec   |           | 8-Dec   |           | 9-Dec   |           | 10-Dec  |           |
|---|---|---------|-----------|---------|-----------|---------|-----------|---------|-----------|---------|-----------|---------|-----------|---------|-----------|---------|-----------|
|   |   | Natural | Optimized |
| S | D | 7.7090  | 7.4423    | 7.0569  | 6.9833    | 6.9404  | 6.5957    | 6.8107  | 6.3461    | 6.5956  | 6.2245    | 6.2690  | 5.8504    | 6.3136  | 6.0495    | 10.2753 | 10.0300   |
|   | N | 14.5470 | 13.1418   | 13.7723 | 12.0581   | 13.5443 | 11.6773   | 11.8334 | 10.1177   | 9.6646  | 8.1311    | 7.0834  | 6.4586    | 6.2957  | 5.9625    | 6.0645  | 5.5210    |
|   | W | 7.6470  | 6.4255    | 7.4820  | 6.8172    | 17.6987 | 17.5244   | 19.0386 | 18.8656   | 12.9715 | 12.7633   | 12.4191 | 12.0923   | 8.7724  | 8.2943    | 8.5334  | 7.8725    |

|   |   | 11-Dec  |           | 12-Dec  |           | 13-Dec  |           | 14-Dec  |           | 15-Dec  |           | 16-Dec  |           | 17-Dec  |           | 18-Dec  |           |
|---|---|---------|-----------|---------|-----------|---------|-----------|---------|-----------|---------|-----------|---------|-----------|---------|-----------|---------|-----------|
|   |   | Natural | Optimized |
| S | D | 10.2047 | 10.0881   | 8.1297  | 8.0495    | 7.0774  | 6.8503    | 5.5408  | 5.1575    | 5.2680  | 4.9749    | 5.0800  | 4.8578    | 4.8355  | 4.6512    | 4.5273  | 3.9280    |
|   | N | 5.9890  | 5.8548    | 5.8178  | 5.1219    | 5.5535  | 4.7771    | 5.3236  | 4.5468    | 5.2430  | 4.8032    | 5.4179  | 4.4548    | 5.4994  | 4.6098    | 5.1485  | 4.4179    |
|   | W | 7.6606  | 6.7058    | 7.7289  | 6.9705    | 9.2437  | 8.8601    | 11.7662 | 10.6656   | 9.9129  | 7.7021    | 8.6415  | 6.3430    | 12.1635 | 8.2762    | 16.5726 | 10.0614   |

|   |   | 19-Dec  |           | 20-Dec  |           | 21-Dec  |           | 22-Dec  |           | 23-Dec  |           | 24-Dec  |           | 25-Dec  |           | 26-Dec  |           |
|---|---|---------|-----------|---------|-----------|---------|-----------|---------|-----------|---------|-----------|---------|-----------|---------|-----------|---------|-----------|
|   |   | Natural | Optimized |
| S | D | 4.2104  | 3.4531    | 3.9201  | 3.6043    | 3.6634  | 3.2629    | 3.6055  | 3.3825    | 3.6101  | 3.0997    | 3.6785  | 3.3651    | 12.3746 | 9.8510    | 16.9485 | 13.7240   |
|   | N | 5.1689  | 4.8500    | 5.8035  | 5.0492    | 5.5200  | 4.5101    | 5.6675  | 5.2047    | 5.7225  | 5.5381    | 5.6032  | 5.2028    | 5.3972  | 4.6826    | 6.4477  | 6.2730    |
|   | W | 14.2411 | 5.9772    | 9.7876  | 1.3401    | 9.4439  | 1.2008    | 14.1592 | 5.8676    | 18.7559 | 10.5803   | 16.7408 | 8.2675    | 12.8848 | 5.2465    | 10.5072 | 3.6997    |

|   |   | 27-Dec  |           | 28-Dec  |           | 29-Dec  |           | 30-Dec  |           | 31-Dec  |           |
|---|---|---------|-----------|---------|-----------|---------|-----------|---------|-----------|---------|-----------|
|   |   | Natural | Optimized |
| S | D | 9.0385  | 6.3488    | 6.2471  | 6.1580    | 7.4868  | 7.2181    | 9.2409  | 9.1191    | 7.4150  | 7.2491    |
|   | N | 7.0936  | 6.4533    | 6.9162  | 6.6080    | 7.8049  | 7.5119    | 6.0031  | 5.1185    | 5.8356  | 5.5903    |
|   | W | 9.9852  | 4.7055    | 9.3109  | 6.4607    | 9.0359  | 6.4435    | 8.7571  | 7.2000    | 8.4092  | 7.8879    |
